# Supplementary material for: Effect of Different Interventions to Help Primary Care Clinicians Avoid Unsafe Opioid Prescribing in Opioid-Naive Patients With Acute Noncancer Pain: A Cluster Randomized Clinical Trial
Source: PubMed Central journal article supplement (PMC9338412; doi:10.1001/jamahealthforum.2022.2263), 2022-07-29
Supplement: jamahealthforum-e222263-s001.pdf [file jamahealthforum-e222263-s001.pdf]

4  
5  
6  
7  
8  
9  
10  
11  
12  
13  
14  
15  
16  
17  
18  
19  
20  
21  
22  
23  
24

**Provider-Targeted Behavioral Interventions to Prevent Unsafe  
Opioid Prescribing for Acute Non-Cancer Pain in Primary Care**

**Study Protocol**

**Principal Investigator:** Kevin L. Kraemer, MD, MSc, Professor of Medicine,  
University of Pittsburgh

**Funder:** Patient Centered Outcomes Research Institute (PCORI)

**Version 2**

Date: October 29, 2021

Date of IRB Renewal Approval: April 14, 2021

ClinicalTrials.gov: NCT03537573

## 25 Table of Contents

|    |                                                                    |    |
|----|--------------------------------------------------------------------|----|
| 26 | PARTICIPATING STUDY SITES .....                                    | 6  |
| 27 | STUDY TEAM ROSTER.....                                             | 6  |
| 28 | University of Pittsburgh/UPMC.....                                 | 6  |
| 29 | Geisinger Health System .....                                      | 7  |
| 30 | University of Utah Health .....                                    | 7  |
| 31 | ABSTRACT.....                                                      | 8  |
| 32 | 1. STUDY OBJECTIVES AND SPECIFIC AIMS .....                        | 9  |
| 33 | 2. BACKGROUND AND RATIONALE .....                                  | 9  |
| 34 | 3. STUDY DESIGN.....                                               | 13 |
| 35 | 4. SELECTION AND ENROLLMENT OF PARTICIPANTS .....                  | 15 |
| 36 | 4.1 Practices .....                                                | 15 |
| 37 | 4.2 Providers.....                                                 | 15 |
| 38 | 4.3 Patients.....                                                  | 15 |
| 39 | 4.4 Study Enrollment Procedures.....                               | 15 |
| 40 | 5. STUDY INTERVENTIONS .....                                       | 16 |
| 41 | 5.1 Guideline .....                                                | 17 |
| 42 | 5.2 Guideline + Opioid Justification.....                          | 18 |
| 43 | 5.3 Guideline + Provider Comparison .....                          | 18 |
| 44 | 5.4 Guideline + Opioid Justification and Provider Comparison ..... | 18 |
| 45 | 6. STUDY PROCEDURES.....                                           | 18 |
| 46 | 6.1 Randomization of Practices.....                                | 18 |
| 47 | 6.2 Recruitment and Informed Consent Procedures .....              | 19 |
| 48 | 7. DATA COLLECTION AND QUALITY ASSURANCE .....                     | 19 |
| 49 | 7.1 Electronic Health Record Data Collection .....                 | 19 |
| 50 | 7.2 Follow-Up Surveys of 642 Patient Subset .....                  | 20 |
| 51 | 7.3 Provider Demographics .....                                    | 20 |
| 52 | 7.4 Data Tracking/Reporting .....                                  | 21 |
| 53 | 7.5 Qualitative Interviews .....                                   | 21 |
| 54 | 7.6 Monitoring of Local Opioid Initiatives.....                    | 23 |
| 55 | 7.7 Outcomes .....                                                 | 23 |
| 56 | 7.8 Quality Assurance and Control.....                             | 23 |
| 57 | 7.9 Data Security .....                                            | 24 |

|    |                                                                        |    |
|----|------------------------------------------------------------------------|----|
| 58 | 8. STATISTICAL CONSIDERATIONS.....                                     | 24 |
| 59 | 8.1 General Approach.....                                              | 24 |
| 60 | 8.2 Analytic Plan for Specific Hypotheses .....                        | 25 |
| 61 | 8.3 Power Calculations .....                                           | 27 |
| 62 | 8.4 Qualitative Analysis for Specific Aim 3 .....                      | 29 |
| 63 | 9. HUMAN SUBJECTS.....                                                 | 30 |
| 64 | 10. ORGANIZATIONAL STRUCTURE.....                                      | 31 |
| 65 | 11. STAKEHOLDER ENGAGEMENT .....                                       | 32 |
| 66 | 12. DISSEMINATION .....                                                | 34 |
| 67 | 13. REFERENCES .....                                                   | 36 |
| 68 | 14. SUPPLEMENTS/APPENDICES.....                                        | 40 |
| 69 | Appendix A: Poster-Flyer in participating clinics.....                 | 40 |
| 70 | Appendix B: Information for Practices .....                            | 41 |
| 71 | Appendix C: Information Sheet for Providers .....                      | 42 |
| 72 | Appendix D: Clinic Letter to Patients (subset of 642) .....            | 43 |
| 73 | Appendix E: Clinic Phone Call Script to Patients (subset of 642) ..... | 44 |
| 74 | Appendix F: Phone Verbal Consent for Patients (subset of 642).....     | 45 |
| 75 | Appendix G: Online Web Consent for Patients (subset of 642).....       | 47 |
| 76 | Appendix H: Recruitment E-mail to Providers (random 100) .....         | 49 |
| 77 | Appendix I: Phone Verbal Consent for Providers (random 100).....       | 50 |
| 78 | Appendix J: Online Web Consent for Providers (random 100).....         | 52 |
| 79 | Appendix K: EHR Data Extraction Computable Phenotype .....             | 54 |
| 80 | Appendix L: Patient Subset (N=642) – Follow-Up Survey .....            | 55 |
| 81 | Appendix M: Milestones/Timetable.....                                  | 56 |
| 82 |                                                                        |    |
| 83 |                                                                        |    |

|    |                                                                                            |    |
|----|--------------------------------------------------------------------------------------------|----|
| 84 | Table of Figures                                                                           |    |
| 85 | Figure 1. Study Design: pragmatic cluster randomized trial in 48 primary care clinics..... | 13 |
| 86 | Figure 2. Study Intervention Groups.....                                                   | 17 |
| 87 | Figure 3. Data flow between PaTH CDRN sites and Pittsburgh HSRDC.....                      | 21 |
| 88 | Figure 4. Outcome Comparison for Hypothesis 1a: Baseline (Qualifying Visit) .....          | 25 |
| 89 | Figure 5. Outcome Comparison for Hypothesis 1b: Patient Reported Outcomes .....            | 26 |
| 90 | Figure 6. Outcome Comparison for Hypothesis 2a: Patients Initiated on Opioids.....         | 27 |
| 91 | Figure 7. PCORI Pain Project Organizational Structure.....                                 | 31 |
| 92 |                                                                                            |    |
| 93 | Table of Tables                                                                            |    |
| 94 | Table 1. Proposed project’s compliance with PRagmatic Explanatory Continuum Indicator      |    |
| 95 | Summary-2 (PRECIS-2) guidance .....                                                        | 14 |
| 96 | Table 2. ERIC Strategies for Dissemination and Implementation.....                         | 34 |
| 97 |                                                                                            |    |

## 98 PARTICIPATING STUDY SITES

- 99 University of Pittsburgh
- 100
- 101 University of Pittsburgh Medical Center (UPMC)/Community Medicine Incorporated
- 102
- 103 Geisinger Health System
- 104
- 105 Geisinger Community Practice Service Line
- 106
- 107 University of Utah
- 108
- 109 University of Utah Health Community Physicians Group
- 110
- 111

## 112 STUDY TEAM ROSTER

### 113 University of Pittsburgh/UPMC

#### 114 *Principal Investigator:*

115 Kevin Kraemer, MD, MSc, Center for Research on Health Care, Division of General Internal Medicine,  
116 Department of Medicine, University of Pittsburgh School of Medicine, 230 McKee Place, Suite 600,  
117 Pittsburgh, PA 15213, Office: 412-692-4843, Fax: 412-692-4838, [kraemerkl@upmc.edu](mailto:kraemerkl@upmc.edu)

118

#### 119 *Project Manager:*

120 Melessa Salay, MPH

121

#### 122 *Co-Investigators:*

123

124 Brian Cohen, PhD (Patient Co-I)

125 Gary Fischer, MD

126 Jennifer Freel, MBA

127 Walid Gellad, MD, MPH

128 Megan Hamm, PhD

129 Andrew Althouse, PhD (Statistician)

130 Ajay Wasan, MD, MS

131

#### 132 *PaTH Personnel*

133 Kathleen McTigue, MD, MPH (PaTH PI)

134 Barbara Postol (PaTH Project Manager)

135 Nickie Capella (Data Manager)

136 Bill Shirley (System Architect)

137 Waqas Amin (Informatician)

138 Hoah-Der Su (Source System Analyst)

139 Geisinger Health System

140 *Site PI:*

141 Eric Wright, PharmD, MPH

142

143 *Clinical PI:*

144 Christina Shook, PsyD, ABPP

145

146 *Site Project Coordinator:*

147 Melissa Kern, MPH

148

149 *Site Research Assistant:*

150 Cayla Pipan

151

152 *Co-Investigators:*

153 Michael Evans, RPh

154 Amy Howell-Harte, MD

155 Joseph Chronowski, MBA (Informatician)

156

157 *PaTH Personnel:*

158 Les Kirchner, PhD (PaTH PI)

159 Ilene Ladd, MS (PaTH Project Manager)

160 Dustin Hartzel (Data Manager)

161

162 University of Utah Health

163 *Site PI:*

164 Adam Gordon, MD, MPH

165

166 *Clinical PI:*

167 David Anisman, MD

168

169 *Co-Investigator:*

170 Jerry Cochran, PhD, MSW

171

172 *Site Project Coordinator:*

173 Connie Kitchen, PhD

174

175 *PaTH Personnel:*

176 Rachel Hess (PaTH PI)

177 Megan Lynch (PaTH Project Manager)

178 Reid Holbrook (System Architect)

179

180

181

182

183 ABSTRACT

184 Our project addresses the research question “What is the comparative effectiveness of different health  
185 system strategies that aim to prevent unsafe opioid prescribing while ensuring access to non-opioid  
186 methods for pain management with the goal of reducing pain and improving patient function and  
187 quality of life outcomes, while reducing patient harm?” We will assess whether behavioral science-  
188 based interventions can “nudge” providers towards more evidence-based care for patient with acute  
189 non-cancer pain.

190  
191 Aim 1) Among opioid naïve primary care patients with acute non-cancer pain, compare the effect of the  
192 provider-targeted behavioral interventions (opioid justification and provider comparison),  
193 individually and in combination, on initial opioid prescription, initial use of non-opioid  
194 management, and patient-reported pain and function.

195  
196 Aim 2) Among primary care patients who receive initial opioid therapy for acute non-cancer pain,  
197 compare the effect of the 2 provider-targeted behavioral interventions, individually and in  
198 combination, on unsafe opioid prescribing and transition to chronic opioid therapy.

199  
200 Aim 3) Assess provider satisfaction and experience with the provider-targeted behavioral interventions.

201  
202 Study Design: Pragmatic, cluster-randomized clinical trial in 48 primary care clinics.

203  
204 Main Components: After implementing an evidence-based acute pain guideline in the electronic health  
205 record (EHR) at each of clinics, we will randomize the clinics to one of 4 intervention groups: 1) Usual  
206 Care; 2) Guideline + Opioid Justification; 3) Guideline + Provider Comparison; and 4) Guideline + Opioid  
207 Justification + Provider Comparison – all interventions delivered.

208  
209 Study Population: The patient population will be 19,855 opioid naïve adults who present to clinic with  
210 acute uncomplicated musculoskeletal pain or headache.

211  
212 Primary and Secondary Outcomes: The primary outcome measures will be receipt of an initial opioid  
213 prescription and unsafe opioid prescribing. Secondary outcomes will be non-opioid pain management,  
214 and, in 642 patients, patient-reported pain and function.

215  
216 Analytic Plan: We will use statistical models to test for differences in the primary and secondary  
217 outcomes among the 4 intervention groups. We will use qualitative analysis methods to assess provider  
218 satisfaction and experience with the interventions.

219  
220 Our multidisciplinary research team will work closely with a Stakeholder Advisory Committee comprising  
221 patients, patient advocates, primary care providers, pain medicine specialists, payers, health system  
222 executives, experts in behavioral science, and regional and national organizations. Once completed, the  
223 project may provide evidence that health systems and other stakeholders need to implement  
224 interventions to prevent unsafe opioid prescribing.

225  
226

## 227 1. STUDY OBJECTIVES AND SPECIFIC AIMS

228 The overall objective of the research study is to compare the effectiveness of several provider-targeted  
229 electronic health record interventions to encourage non-opioid management and prevent unsafe opioid  
230 prescribing in outpatients with acute non-cancer pain.

231  
232 With this pragmatic cluster-randomized trial, we will achieve the following specific aims:  
233

234 Specific Aim 1) Among opioid naïve primary care patients with acute non-cancer pain, compare the  
235 effect of the provider-targeted behavioral interventions (opioid justification and provider comparison),  
236 individually and in combination, on initial opioid prescription, initial use of non-opioid management, and  
237 patient-reported pain and function at 1, 6, and 12 months.

238  
239 Hypotheses: Compared with usual care (guideline) alone, the addition of the opioid justification and  
240 provider comparison behavioral interventions will be associated with:

241  
242 Hypothesis 1a: Decreased proportion of opioid prescription and increased proportion of non-  
243 opioid management at the initial outpatient visit for acute non-cancer pain.

244  
245 Hypothesis 1b: No difference in patient-reported pain, function, and satisfaction at 1, 6, and 12  
246 months.

247  
248 Specific Aim 2) Among primary care patients who receive initial opioid therapy for acute non-cancer  
249 pain, compare the effect of the 2 provider-targeted behavioral interventions, individually and in  
250 combination, on unsafe opioid prescribing and transition to chronic opioid therapy (> 3 months).

251  
252 Hypothesis 2: Compared with the usual care (guideline), the addition of opioid justification and provider  
253 comparison behavioral interventions will be associated with a decreased proportion of patients  
254 receiving unsafe opioid therapy and a decreased proportion of patients transitioning to chronic opioid  
255 therapy.

256  
257 Specific Aim 3) Assess provider satisfaction and experience with the provider-targeted behavioral  
258 interventions.

259

## 260 2. BACKGROUND AND RATIONALE

261 The priority research question in the PCORI Funding Announcement (PFA) that our project addresses is  
262 “What is the comparative effectiveness of different payer or health system strategies that aim to  
263 prevent unsafe opioid prescribing while ensuring access to non-opioid methods for pain management  
264 with the goal of reducing pain and improving patient function and quality of life outcomes, while  
265 reducing patient harm?” This was the highest ranked research question (of 60 total) by a multi-  
266 stakeholder group at the “Preventing Opioid Misuse in the Management of Pain” PCORI workshop on  
267 March 7, 2016. Our focus will be on acute non-cancer pain as it presents in the primary care setting.  
268 Much prior research and many prior guidelines have focused on chronic non-cancer pain and chronic  
269 opioid therapy. There is a great need to develop effective approaches to acute non-cancer pain. Our  
270 local patient, provider, and health system stakeholders agreed this was an important question to focus



271 on for western Pennsylvania and the PaTH Future Research Topics Workgroup felt the same for the  
272 PaTH Network.

273  
274 Acute non-cancer pain is very common. Up to 100 million individuals in the United States have pain  
275 annually, the majority due to short-term illnesses, injury, and medical procedures. Two of the most  
276 common acute non-cancer pain conditions, acute spinal (back and neck) pain and acute headache, are  
277 illustrative. Acute spinal pain accounts for over 10% of primary care visits in the US and approximately  
278 \$86 billion in direct healthcare costs and \$20 billion in indirect lost work productivity costs annually.  
279 Likewise, headache accounts for 12 million primary care visits per year and approximately \$31 billion in  
280 direct healthcare costs annually. Because of the high prevalence and high societal costs of acute non-  
281 cancer pain, it is Because of the high prevalence and high societal costs of acute non-cancer pain, it is  
282 imperative for healthcare providers and systems to offer patients effective treatment options that  
283 reduce symptoms, improve function, facilitates return to activities, and prevents future problems due to  
284 over-prescribing. Depending on the specific cause of acute non-cancer pain and characterization of the  
285 pain as somatic, visceral, or neuropathic, treatment options may include non-opioid medications (e.g.,  
286 acetaminophen, non-steroidal anti-inflammatory drugs (NSAIDs), gabapentin/pregabalin, serotonin and  
287 norepinephrine reuptake inhibitors (SSRIs/SNRIs), and tricyclic antidepressants (TCAs)), non-  
288 pharmacologic local measures (e.g., ice, heat, splinting, wraps, massage, tactile stimulation,  
289 acupuncture/acupressure), physical therapy, cognitive behavioral therapy, and opioid medications. All of  
290 these approaches, alone or in combination, can be effective in relieving acute pain. The evidence  
291 suggests that non-opioid management is the preferred option for the common pain conditions of  
292 headache, uncomplicated acute back, neck, and musculoskeletal pain, and self-limited illness (e.g. sore  
293 throat). For acute spinal pain and headache, recent national estimates indicate opioid prescribing rates  
294 of 29% and 18%, respectively. Although acute pain can often be managed without opioids, there are  
295 circumstances (e.g., severe pain, severe injury, post-surgical, ineffectiveness of non-opioid medications)  
296 where short-term opioid therapy is indicated and beneficial. Evidence suggests, however, that  
297 prescribing of opioid medications in the US has resulted in significant harm.

298  
299 *In the US, opioid prescriptions for non-cancer pain have increased several-fold in recent decades with no*  
300 *significant improvement in patient-reported pain and function.* In 1991, 76 million opioid prescriptions  
301 were written in the US, rising steadily to 219 million opioid prescriptions in 2011, and falling slightly to  
302 207 million in 2013, whereas other data estimate 259 million opioid prescriptions in 2012 and 245  
303 million in 2014. Although the proportion of opioid prescriptions written for chronic vs. acute pain is not  
304 clear, 65% of opioid prescriptions in 2014 were for less than 3 weeks supply, suggesting the  
305 prescriptions were written for acute pain. Likewise, while it is not clear what proportion of patients who  
306 receive short-term opioid therapy transition to chronic opioid therapy, 9.6 to 11.5 million US adults  
307 received a prescription for long-term opioid therapy in 2014. The trend in increased use of opioids is  
308 associated with a current national public health crisis of opioid-related harms, including opioid misuse  
309 (using prescription opioids in any way other than as prescribed), opioid use disorders (defined by DSM-  
310 5), and non-fatal and fatal overdose. In 2015, 12.5 million misused prescription opioids, including 2.1  
311 million new misusers that year, of whom 63% reported the opioid use was to relieve pain. Treatment for  
312 opioid use disorder increased along with the rise in opioid prescriptions from 199 to 2009. Between  
313 2000 and 2014, the rates of prescription opioid overdose death nearly quadrupled from 1.5 to 5.9  
314 deaths per 100,000 people. Although opioid prescriptions stabilized somewhat from 2010 to 2012,  
315 heroin use increased 36% from 2008 to 2013 and heroin, suggesting the possibility of former  
316 prescription opioid users switching to heroin. Among heroin users entering substance abuse treatment,  
317 75% note their opioid use began with prescription opioids. Thus, the dramatic rise in opioid prescribing

318 for pain parallels the dramatic rise in opioid use disorders and fatal complications. The overreliance on  
319 opioids for acute pain fuels, in part, this public health crisis.

320  
321 Although the response to the national opioid crisis must be multipronged and include healthcare, public  
322 health, community, law enforcement, and governmental resources, there is agreement that encouraging  
323 healthcare providers to adhere to safe evidence-based opioid prescribing practices should be a major  
324 part of the response. An effective strategy to help healthcare providers adopt non-opioid pain  
325 management strategies and, when opioids are deemed necessary, adhere to safe opioid prescribing  
326 practices for acute non-cancer pain has the potential to prevent downstream progression to chronic  
327 opioid therapy, reduce opioid related harms, and improve patient function and quality of life. However,  
328 despite this potential for improving short-term and long-term outcomes in patients with acute non-  
329 cancer pain, there are many gaps in evidence that must be addressed before interventions can be  
330 confidently implemented. Given the priority research question of our proposed project, we will focus on  
331 gaps in evidence for healthcare system approaches to opioid prescribing.

332  
333 The majority of research and intervention development to date has focused on patients receiving  
334 chronic opioid therapy for chronic non-cancer pain. Some healthcare system interventions, such as  
335 those implemented by the VA and Kaiser Permanente, have resulted in decreased prescriptions for long-  
336 acting/extended-release opioids and reduced average morphine milligram equivalent dosing but it is not  
337 known if these reductions have resulted morphine milligram equivalent dosing but it is not known if  
338 these reductions have resulted in patient benefit. There has been minimal research and development of  
339 healthcare system interventions to encourage non-opioid management and, when needed, safer opioid  
340 prescribing in the acute stages of non-cancer pain treatment, when opioids are first prescribed or  
341 considered.

342  
343 The optimal strategy for health systems to encourage providers to prescribe to non-opioid management  
344 and adhere to safe opioid prescribing guidelines for acute pain is not known. Provider-targeted  
345 interventions to decrease unsafe opioid prescribing have focused on chronic pain and have not been  
346 rigorously evaluated. For acute pain, just 1 of the 12 recommendations of the recent CDC Guideline for  
347 Prescribing Opioids for Chronic Pain focused on acute pain; CDC recommended that, if opioids are used,  
348 to use the lowest effective of an immediate-release opioid and to restrict prescription to short duration  
349 (recommended 3 days or less; more than 7 days rarely). This recommendation, while reasonable, was  
350 based on low quality evidence and health system interventions to encourage compliance with the  
351 recommendation have not been conducted. Some small, non-randomized studies of opioid guidelines  
352 for acute pain demonstrated decreased initial opioid prescriptions in emergency department and family  
353 medicine settings. Other guidelines, including the Institute for Clinical Systems Improvement (ICSI)  
354 “Acute Pain Assessment and Opioid Prescribing Protocol,” have culled a low-quality evidence base to  
355 develop acute pain guidelines with good face validity but never tested in a rigorous fashion. As such, we  
356 do not know the optimal approaches to encourage providers to adhere to safe opioid prescribing and  
357 increase the use of non-opioid strategies while concurrently helping patients with pain and function.

358  
359 Patient sub-groups and primary care clinic settings that benefit more and less from health system  
360 interventions for acute pain management is not known. There is little empiric evidence to suggest  
361 whether health system delivered behavioral interventions for acute pain management would be more  
362 effective in certain clinic settings or for certain patient populations. We speculate that such  
363 interventions may be less effective in rural clinics where non-opioid management strategies, such as  
364 physical therapy, might be less available and perhaps more effective among a higher risk (e.g., history of  
365 substance use disorder, mental health problems) patient population where the intervention encourages

366 the provider to be more cautious. However, there is little data on which to base a priori hypotheses.  
367 Instead, we plan exploratory analyses of a number of sub-groups. Provider and patient satisfaction and  
368 attitudes about health system provider-targeted behavioral interventions for acute pain management is  
369 not known. Although our intention is for the behavioral interventions to be low-burden, fit within the  
370 provider's work flow, and preserve autonomy, we do not know if providers or patients will perceive the  
371 interventions that way and be satisfied with their implementation. To address this gap, we plan  
372 qualitative interviews of a sample of providers and patients across the sites.

373  
374 *Significance*

375  
376 Providers do not always act rationally and deliver the most evidence-based care. Interventions to  
377 change provider behavior, including clinical guidelines, pay for performance, and computerized decision  
378 support have a modest history of success. In general, interventions to change provider behavior are  
379 challenging. EHR alerts and reminders can lead to "alert fatigue" and be ignored. Uptake of EHR-based  
380 guidelines and pathways also have low uptake and adherence. To improve the delivery of evidence  
381 based, high value care, there is growing interest in using concepts from the fields of behavioral  
382 economics and psychology to "nudge" providers toward providing evidence based care. Despite the  
383 scarcity of direct evidence to support the efficacy/effectiveness of behavioral nudges for opioid  
384 prescribing, there is compelling evidence for the use of behavioral science based interventions to  
385 prevent inappropriate, guideline-discordant prescribing in similar clinical scenarios to our proposed  
386 project. We have based our behavioral interventions on the work of several groups. Most influential to  
387 us was the recent cluster-randomized trial of Meeker et al. to reduce inappropriate antibiotic  
388 prescribing for upper respiratory infection among 14,753 outpatients. In that study, accountable  
389 justification and peer comparison reduced inappropriate antibiotic prescribing by 7% ( $p < .001$ ) and 5%  
390 ( $p < .001$ ), respectively, compared with control. The prescriber decision processes, guideline influence,  
391 and behavioral interventions are similar between the Meeker study and our proposed study. Given the  
392 similarity of the clinical decision, efficacy of the behavioral interventions, and urgency of addressing the  
393 opioid issue, we believe our planned comparators are appropriate for study in this context.

394  
395 Our project and planned comparisons are highly important for patients, providers, and health system  
396 decision makers. We spoke with stakeholders from each group to confirm this. For providers, the health  
397 system intervention with the best patient outcomes and least workflow disruption and most  
398 preservation of autonomy will be the most ideal. The providers we spoke with recognized the role that  
399 early opioid prescribing could have on long-term opioid use but noted that opioid refills were too easy  
400 to write. Behavioral science based interventions have the potential to "nudge" providers toward  
401 guideline-concordant care and safer opioid prescribing while preserving autonomy and freedom of  
402 clinical decision-making. For health system decision makers, there is a definite decision dilemma among  
403 interventions as choice of an intervention must balance effectiveness for improving pain symptoms and  
404 function and reducing harm, maintain physician autonomy and satisfaction without disrupting workflow,  
405 and be feasible, sustainable, and scalable. To prevent overburdening providers and decreasing efficiency  
406 of care, health systems must be judicious in choosing which EHR interventions/innovations to  
407 implement. Behavioral "nudges," if simple and well-designed, can be speedy, in the work flow of a busy  
408 provider, and effective.

409  
410 In the treatment of acute non-cancer pain, reduced pain symptoms and improved function is of highest  
411 importance. Therefore, for patients, the intervention that yields the most effective, evidence-based  
412 care, with reduced pain and short- and long-term harm, and improved function will be the most ideal.  
413 Further, patients do not like to feel their provider is being compelled to make decisions based on

414 external factors (e.g., pre-authorization, mandates). Behavioral nudges can encourage high-quality  
 415 evidence-based care while preserving the provider’s freedom of management. The potential of this  
 416 project to increase evidence-based non-opioid management, decrease unsafe opioid prescribing,  
 417 improve patient symptoms and function, and decrease long-term harm makes it highly patient centered.  
 418

419 **3. STUDY DESIGN**

420 The project is a pragmatic cluster-randomized trial. Forty-eight (48) primary care clinics (24 UPMC  
 421 clinics, 13 Geisinger clinics, 11 Utah clinics) will be randomized in a 2x2 factorial design to one of 4  
 422 provider-targeted intervention groups (described in detail below): 1) Guideline; 2) Guideline + Opioid  
 423 Justification; 3) Guideline + Provider Comparison; and 4) Guideline + Opioid Justification + Provider  
 424 Comparison. The electronic health record (EHR) based interventions will be applied in the participating  
 425 clinics in a quality improvement fashion.  
 426

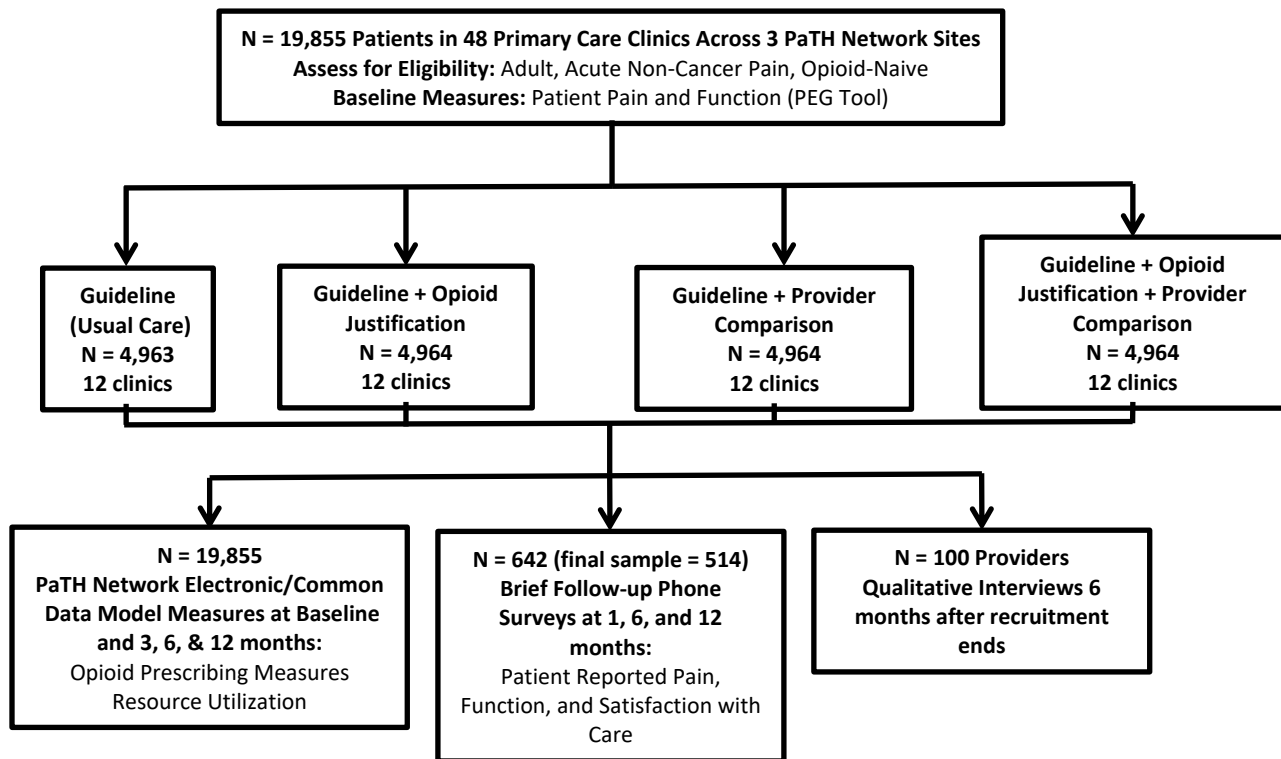

428  
 429 *Figure 1. Study Design: pragmatic cluster randomized trial in 48 primary care clinics*

430 **Justification for Cluster Randomized Trial and 2x2 factorial design.** We chose a pragmatic cluster-  
 431 randomized trial as the most appropriate design because we wish to assess the behavioral interventions  
 432 across a broad range of primary care clinical settings while minimizing contamination. The unit of  
 433 randomization will be the individual primary care clinic (cluster). Stakeholders including the PaTH  
 434 Network Future Research Workgroup Provider, health system administrators, and provider stakeholders  
 435 agreed that a cluster randomized design was the most feasible design given the architecture of the Epic  
 436 EHR (i.e., easier to enable a specific intervention feature for an entire practice site vs. for individual  
 437 providers) and the need to avoid contamination among providers at a specific practice. A major  
 438 advantage of 2x2 factorial design is the ability to test the usual care (guideline) versus opioid

439 justification, usual care (guideline) versus provider comparison, and opioid justification versus provider  
 440 comparison, while the standard 2-arm trial can make only one of those three comparisons. Also, if  
 441 assuming no interaction between interventions (as was observed in the Meeker antibiotic study), we can  
 442 test usual care (guideline) versus opioid justification and versus provider comparison using half the  
 443 sample size of 2 separate 2-arm studies.  
 444

445 **Adherence to Pragmatic Trial Design Principles.** We have taken systematic steps in the design of this  
 446 cluster-randomized trial to adhere carefully to principles of pragmatic trial design, as specified by the  
 447 **PRagmatic Explanatory Continuum Indicator Summary-2 (PRECIS-2)** tool. As shown in the Table below,  
 448 our proposed project is highly pragmatic.  
 449

450 *Table 1. Proposed project's compliance with PRagmatic Explanatory Continuum Indicator Summary-2 (PRECIS-2) guidance*

| PRECIS-2 Domain                                                                                   | Criterion to be pragmatic                                                                                                                                           | Answer for the Project                                                                                                                                                            | Pragmatic Rating |
|---------------------------------------------------------------------------------------------------|---------------------------------------------------------------------------------------------------------------------------------------------------------------------|-----------------------------------------------------------------------------------------------------------------------------------------------------------------------------------|------------------|
| <i>Eligibility</i>                                                                                | To what extent are participants similar to those who would receive this intervention if it was part of usual care?                                                  | Clinic and patient participants are identical to those who would receive the intervention in usual care                                                                           | 5                |
| <i>Recruitment</i>                                                                                | How much extra effort is made to recruit participants over and above what would be used in usual care setting to engage patients?                                   | Patients will be outside of usual care setting but will not be seen face-to-face and assessments will be minimal                                                                  | 4                |
| <i>Setting</i>                                                                                    | How different are the settings of the trial from the usual care settings?                                                                                           | Trial is closely integrated into usual care setting                                                                                                                               | 5                |
| <i>Organization</i>                                                                               | How different are the resources, provider expertise, and the organization of care delivery in the intervention arm of the trial from those available in usual care? | Trial is designed for interventions to be integral part of usual care                                                                                                             | 5                |
| <i>Flexibility (delivery)</i>                                                                     | How different is the flexibility in how the intervention is delivered and the flexibility anticipated in usual care?                                                | Although interventions are targeted at provider behavior, the provider's decision-making and behavior is not constrained                                                          | 5                |
| <i>Flexibility (adherence)</i>                                                                    | How different is the flexibility in how participants are monitored and encouraged to adhere to the intervention from the flexibility anticipated in usual care?     | There is no difference in adherence monitoring from that anticipated in usual care                                                                                                | 5                |
| <i>Follow-up</i>                                                                                  | How different is the intensity of measurement and follow-up of participants in the trial from the typical follow-up in usual care?                                  | We will ask a sample of 100 providers to complete a qualitative interview at the end of the study and a sample of 642 patients to each complete 3 brief telephone surveys         | 4                |
| <i>Primary Outcome</i>                                                                            | To what extent is the trial's primary outcome directly relevant to participants?                                                                                    | For patients, the primary outcome (initial opioid prescription) is relevant: decreased opioid receipt may reduce downstream opioid risks but maintain pain relief and functioning | 5                |
| <i>Primary analysis</i>                                                                           | To what extent are all data included in the analysis of the primary outcome?                                                                                        | All data will be included                                                                                                                                                         | 5                |
| *PRECIS-2 Pragmatic Scale: 1 = high explanatory/low pragmatic, 5 = low explanatory/high pragmatic |                                                                                                                                                                     |                                                                                                                                                                                   |                  |

451

## 452 4. SELECTION AND ENROLLMENT OF PARTICIPANTS

### 453 4.1 Practices

454 Inclusion Criteria: i) Internal Medicine or Family Medicine Practice in primary care network of the 3  
455 participating systems; ii) Use of Epic electronic health record; iii) More than one primary  
456 care provider (see section 4.2)

457 Exclusion Criteria: None

### 458 4.2 Providers

459 Inclusion Criteria: Primary care provider (MD, DO, PA, NP) at participating practice

460 Exclusion Criteria: None

### 461 4.3 Patients

462 Inclusion Criteria: i) Age 18 years or older; ii) Index outpatient encounter with ICD-10 code for acute  
463 neck, back, or other musculoskeletal and headache diagnosis (“acute” defined as no  
464 similar diagnosis in past 6 months).

465 Exclusion Criteria: i) Cancer diagnosis (other than non-melanoma skin cancer); ii) Receipt of opioid  
466 prescription within 12 months of index outpatient encounter

### 467 4.4 Study Enrollment Procedures

#### 468 4.4.1 Practices

469 We will recruit 24 UPMC practices, 13 Geisinger practices, and 11 University of Utah Health Care primary  
470 care practices. There are more potential sites overall across the 3 geographic locations to provide  
471 qualifying patients than required for the successful completion of the trial. The 24 UPMC clinics will be  
472 recruited from UPMC Community Medicine Incorporated (100+ clinics, 450,000 patients, average size  
473 4500 patients/clinic). The 13 Geisinger clinics will be recruited from the Geisinger Community Practice  
474 Service Line (43 clinics, 300,000 patients, average size 6976 patients/clinic). The 11 Utah clinics will be  
475 recruited from the University of Utah Health Community Physicians Group (11 clinics, 150,000 patients,  
476 average size 12,500 patients/clinic (includes children)).

477  
478 Screening Procedures for Practices: All primary care Internal Medicine and Family Medicine practices in  
479 the 3 health systems above will be eligible. Upon project initiation, the PI will work directly with the site  
480 PIs, site Clinical Champions, and primary care network directors to contact, via phone call, email, and/or  
481 direct interaction (face-to-face meetings and primary care network meetings) with primary care clinic  
482 directors and providers to introduce the project (information sheet for practices attached), provide  
483 information, and ask for participation. We anticipate a mix of urban and rural practices across the 3  
484 systems. Randomization of participating practices will be stratified by system and urban/rural. Once  
485 randomized, providers at practices will receive a brief description of the arm their practice is  
486 randomized to.  
487

#### 488 4.4.2 Providers

489 A subset of 100 providers across the 48 clinics will be selected and consented for the Aim 3 12-month  
490 qualitative interview.

491  
492 Screening Procedures for Providers: All providers who see patients at the participating practices will be  
493 eligible. Once the 12 months of patient recruitment is done, we will contact a random sample of 100  
494 providers (stratified by health system and study arm) by e-mail (Appendix H). The e-mail will contain a  
495 link to consent (Appendix J), which when clicked by the provider will alert the research team to contact  
496 the provider and schedule an interview. If no response to the e-mail, we will contact the provider by  
497 phone (Appendix I) to set up a time to further describe the project and schedule the interview. If contact  
498 is unsuccessful after 3 attempts, we will randomly select another provider to replace them. If this  
499 process has a low yield, we will contact all of the remaining providers (that were not previously included  
500 in the random sample) at the participating practices by email.

#### 501 4.4.3 Patient Participants

502 We anticipate at least 19,855 qualifying opioid-naïve adult patients with acute musculoskeletal pain or  
503 headache over the 12-month recruitment period.

504  
505 Screening Procedures for the 19,855 patients: Once the interventions are implemented in the  
506 participating clinics, the PaTH Network Data Managers for each of the 3 health systems (UPMC,  
507 Geisinger, Utah) will start running weekly reports, based on PCORnet Common Data Model data  
508 extracted from the Epic EHR, of patients seen in participating clinics that meet inclusion/exclusion  
509 criteria.(Appendix K) Patients meeting the inclusion/exclusion criteria will be entered by secure  
510 computerized transfer into the de-identified analytic data set at the secure University of Pittsburgh  
511 Health Services Research Data Center.

512  
513 Screening Procedures for the 642 patient subset to complete brief 1, 6, and 12 month surveys: We plan  
514 to recruit a 642 patient subset of the 19,855 total sample. This will be patients who complete the  
515 baseline PEG tool, administered as part of regular clinical care. The local PaTH Data Manager team at  
516 each health system will apply the screening criteria for this subset during the weekly Epic EHR data  
517 extraction for each participating clinic in their system. A weekly list of eligible patients will then be  
518 available to the project personnel. There will be a poster/flyer (Appendix A) placed in each participating  
519 clinic to alert patients of the project and the possibility of being contacted.

520

## 521 5. STUDY INTERVENTIONS

522 The EHR-based quality improvement interventions will be programmed into the Epic EHR for the  
523 participating clinics by the local health system EPIC staff. For all comparator groups, the evidence-based  
524 guideline will be triggered in the EHR by provider entry of a new opioid prescription in an opioid-naïve  
525 patient (no opioid script in prior 12 months) during an in-person outpatient clinic encounter at a  
526 participating clinic. In any of the 4 comparator groups, the provider has autonomy and is free to pursue  
527 the management strategy of their choice.

528



529 5.1 Guideline

530 The Guideline group will be the closest in content and structure to typical Epic clinical decision supports  
 531 and best practice alerts. The guideline will follow the recent CDC guidelines and, when triggered by an  
 532 opioid prescription during a qualifying visit, will be delivered real-time in a short checklist of  
 533 recommendations to: 1) check the state-specific Prescription Drug Monitoring Program; 2) assess risk  
 534 factors for opioid-related harms (e.g., history of substance use disorder, history of mental health  
 535 problems, benzodiazepine use); 3) avoid extended-release or long-acting opioids; 4) use a low dose of  
 536 immediate-release opioid for short period of time (3-7 days); and 5) consider non-opioid management

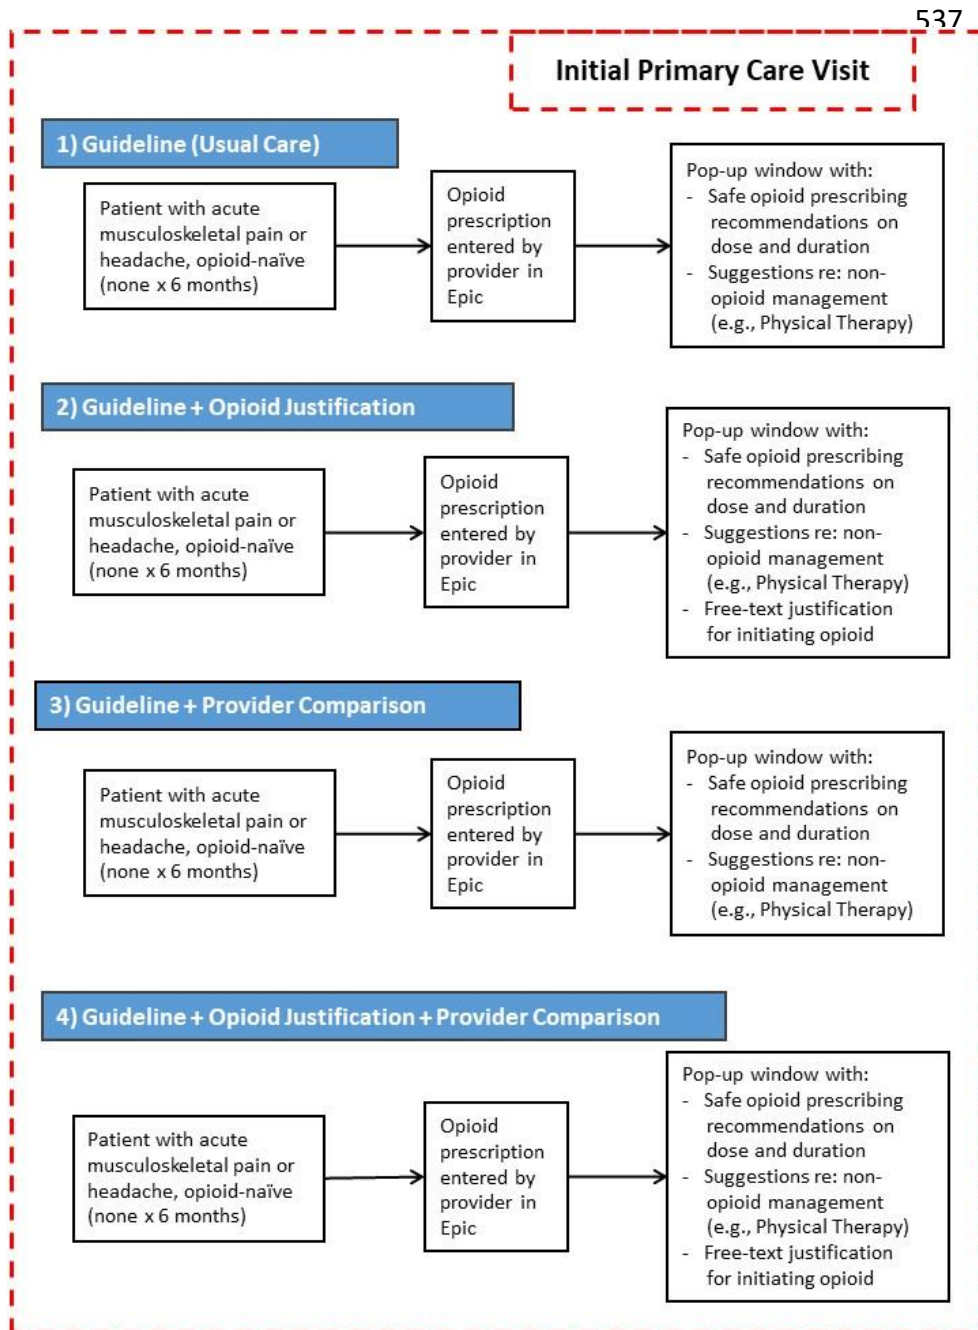

such as acetaminophen, non-steroidal anti-inflammatory agents (NSAIDs), and physical therapy. Epic EHR order sets will be linked to enable easing ordering of non-opioid therapy. The order sets (Smart Sets) for non-opioid management new toward “active choice,” a type of behavioral intervention where a more evidence-based choice is made easier than the non-evidence based option. Although the “active choice” aspect of this may seem like a “strong” usual care component in this context, it should be noted that the provider has already entered an opioid prescription that serves as their default choice.

Figure 2. Study Intervention Groups



## 575 5.2 Guideline + Opioid Justification

576 In addition to receiving the Epic EHR guideline above, providers will be asked to enter a free text  
577 justification for their decision to prescribe an opioid analgesic for the acute pain condition. The provider  
578 will be notified that the justification provided will be visible in the Epic EHR. The provider has the option  
579 of entering a justification or not. If no justification is entered, nothing will be entered into the record  
580 (i.e., the Opioid Justification area in the encounter record will be left blank). The provider does not need  
581 to enter a justification if they choose to cancel the opioid prescription. This intervention arm is similar to  
582 the “accountable justification” strategy used by Meeker et al in the antibiotic study. This intervention is  
583 based on social psychology research that indicates individuals will act in line with norms and guidelines  
584 due to reputational concerns. That is, the strategy leverages the provider’s motivation to act within  
585 relevant norms, reflected by adherence to clinical guidelines, and desire to preserve their reputation, as  
586 reflected in the “public” opioid justification.

## 587 5.3 Guideline + Provider Comparison

588 In addition to receiving the Epic EHR guideline as described above, providers will receive monthly  
589 feedback via e-mail on their status in regards to initial opioid prescriptions for acute pain, adherence to  
590 safe opioid prescribing guidelines, and proportion of patients started on opioids website or acute pain  
591 who transition to chronic opioid therapy (> 3 months). Providers in the lowest decile overall for  
592 proportion of patients with initial opioid prescriptions , unsafe opioid prescribing, and transition to  
593 chronic opioid therapy (> 3 months) will be given positive feedback for providing high quality, evidence-  
594 based care to their patients with acute pain. Providers outside the “high quality” group will be notified  
595 they are outside the high quality, evidence-based care range and will be provided with their proportions  
596 compared to the average high performers’ proportions. Provider comparison feedback e-mails will not  
597 be sent for an individual provider until the provider has at least 20 qualifying acute pain patient  
598 encounters (see section 8). Again, the provider comparison intervention is similar to the Meeker et al.  
599 “peer comparison” arm. Although the provider comparison necessarily does not rise to the level of  
600 public “report card” disclosures, it goes beyond the usual feedback intervention in that it provides a high  
601 standard for the lower performers to strive for and gives enforcing feedback to the higher performers.

## 602 5.4 Guideline + Opioid Justification and Provider Comparison

603 Providers will receive the guideline and both behavioral interventions, as described in sections 5.1 to  
604 5.3.

605

## 606 6. STUDY PROCEDURES

### 607 6.1 Randomization of Practices

608 We will randomize the 48 clinic sites to one of the 4 intervention arms. Given expected differences  
609 among the 3 PaTH geographic locations in local initiatives to address opioid prescribing, we plan to have  
610 even distribution of the interventions across the 3 systems. The unit of randomization is the primary  
611 care clinic. We will perform randomization stratified by health system and geography (urban vs. rural).  
612 Our rationale for stratified randomization is: 1) as discussed, each health system might implement new  
613 interventions/procedures to prevent unsafe opioid prescription, with potential impact on outcomes; and

614 2) prescription opioid misuse is higher in rural areas, possibly reflecting increasing propensity to opioid  
615 prescribing in rural areas. Dr. Althouse, the project's lead statistician, will conduct randomization using R  
616 software (R Foundation for Statistical Computing, Vienna, Austria).

## 617 6.2 Recruitment and Informed Consent Procedures

618 We will have a waiver to document informed consent for participants.

### 619 A) Patient Participants

620 Patients with qualifying clinic encounters will be tracked through the EHR by the local PaTH team. The  
621 interventions are minimal risk, targeted at providers, and occur in the flow of routine care, making it  
622 likely that patients will not notice any difference from routine care. We will request a waiver of informed  
623 consent for all 19,855 patients to undergo the research procedure of medical record abstraction. These  
624 outcomes will only be monitored via the the EHR and then transmitted in de-identified format to the  
625 University of Pittsburgh Health Services Research Data Center. The remaining 642 patients (randomly  
626 selected from those with baseline PEG data) will be sent a letter, signed by their local clinic director but  
627 sent by the local (Pitt/UPMC, Geisinger, or Pitt) study staff, after the qualifying clinic visit. In the letter,  
628 patients will be given the option to initiate phone or web consent procedures for the 1, 6, and 12 month  
629 brief telephone or web surveys or to actively decline to participate. We will request a waiver of signed  
630 informed consent for this 642 patient subset. A similar process is being used by the PCORI-supported  
631 multi-site TARGET low back pain trial, with IRB approval.

### 632 B) Provider Participants

633 We will randomly select 100 providers for the qualitative interviews. Randomization will be stratified by  
634 the 4 study arms and the 3 healthcare systems (UPMC, Geisinger, Utah). Stratification by study arm and  
635 healthcare system will systems (UPMC, Geisinger, Utah). Stratification by study arm and healthcare  
636 system will allow comparison of results across those factors. We will contact randomized providers by e-  
637 mail (Appendix H). The e-mail will contain a link to consent (Appendix J), which when clicked by the  
638 provider will alert the research team to contact the provider and schedule an interview. If no response  
639 to the e-mail, we will contact the provider by phone (Appendix I) to set up a time to further describe the  
640 project and schedule the interview. If contact is unsuccessful after 3 attempts, we will randomly select  
641 another provider to replace them. If this process has a low yield, we will contact all of the remaining  
642 providers (that were not previously included in the random sample) at the participating practices by  
643 email.  
644

## 645 7. DATA COLLECTION AND QUALITY ASSURANCE

### 646 7.1 Electronic Health Record Data Collection

647 The majority of data will be collected through the PaTH network's established access to the Epic EHR of  
648 each of the 3 health systems. The PaTH Data Managers have the ability to query the Epic EHR and to  
649 extract health record data into datasets and to create reports. Through the PaTH/CDRN/PCORnet  
650 Common Data Model, we have defined, standardized individual level variables (see below) across the 3  
651 PaTH sites, allowing the project to efficiently track the 19,855 patients for the EHR-tracked outcomes. It  
652 is important to note that data will be extracted for all 19,855 individuals who meet qualifying clinic visit  
653 criteria, not just the subset of patients who have an initial opioid prescribed. In addition, PaTH/CDRN

654 will easily enable collection of patient demographics, diagnoses, medications, outpatient and inpatient  
655 encounters, and services such as physical therapy. Pharmacy data will be assessed to verify opioid naïve  
656 status at the qualifying acute care encounter. For assessment of outcomes, only prescribing data will be  
657 collected.

658  
659 The Common Data Model variables to be extracted include:

- 660 1) Baseline Visit Common Data Model variables for eligible patients: Age, Gender, Race, Ethnicity  
661 (Hispanic), Visit Diagnosis, Date, Tobacco, Diagnoses, Medications.
- 662 2) Among qualifying patients, proportion that receive a NEW (defined as no prior opioid  
663 prescription in prior 12 months) opioid prescription. Qualifying opioid prescriptions are  
664 oxycodone, hydrocodone, morphine, hydromorphone, oxymorphone, fentanyl patch, codeine,  
665 tramadol, methadone (including name, dose, #pills, follow-up fills for any opioid dispensed).
- 666 3) Baseline and follow-up variables: opioid medications (see above), non-opioid medications (e.g.,  
667 NSAIDs, acetaminophen, tricyclic antidepressants, gabapentin, pregabalin, SSRI, SNRI,  
668 benzodiazepine, muscle relaxant), urine drug screens, physical therapy order, physical therapy  
669 visits, pain clinic referral order, pain clinic visits, behavioral therapy referral order, behavioral  
670 therapy visits, massage therapy order, massage therapy visits, follow-up outpatient visits and dx,  
671 emergency room visits and diagnosis, inpatient admission and diagnosis.

672  
673 In addition, we will be able to track the Best Practice Advisory alerts that fire during the intervention.  
674

675 The PaTH Network employs extensive security measures to ensure all patient information remains safe  
676 and private. The Common Data Model and study data sets are stored in the University of Pittsburgh's  
677 highly protected Health Services Research Data Center (HSRDC) ([www.ccm.pitt.edu/health-services-research-data-center-hsrdc](http://www.ccm.pitt.edu/health-services-research-data-center-hsrdc)) and analyzed remotely via secure virtual desktops. The flow of data  
678 between the PaTH sites and the HSRDC is depicted in the flow chart below. The PaTH data pulls from the  
679 local sites will be done weekly for recruitment purposes and quarterly for data collection purposes  
680 during the project period.  
681

## 682 7.2 Follow-Up Surveys of 642 Patient Subset

683 For a subset of 642 patients who complete the PEG at baseline, we plan to conduct very brief (< 5  
684 minutes) surveys where the 3-item PEG and a single pain management satisfaction question (Appendix  
685 L) are administered at 1, 6, and 12 months after baseline. This will be done primarily via a secure custom  
686 web-based online survey system that will send reminders for completion before each survey. For  
687 individuals who do not wish to use the online system, we will offer the option of a brief phone survey  
688 with our research staff. It is necessary to offer phone survey in addition to the online survey because  
689 some patients will not be comfortable with electronic communication and we do not wish to bias the  
690 sample.

## 691 7.3 Provider Demographics

692 We will collect provider demographics (age, gender), specialty, years since first licensure, and clinic  
693 hours per week for providers at each participating primary care clinic and use a de-identified provider-  
694 specific code to link these data to specific patients.  
695

696 7.4 Data Tracking/Reporting

697 The PaTH Network and Epic EHR teams at each site will pull and collate data regularly from the EHR and  
 698 prepare reports. These include tracking of the total numbers of opioid-naïve patients for whom EHR best

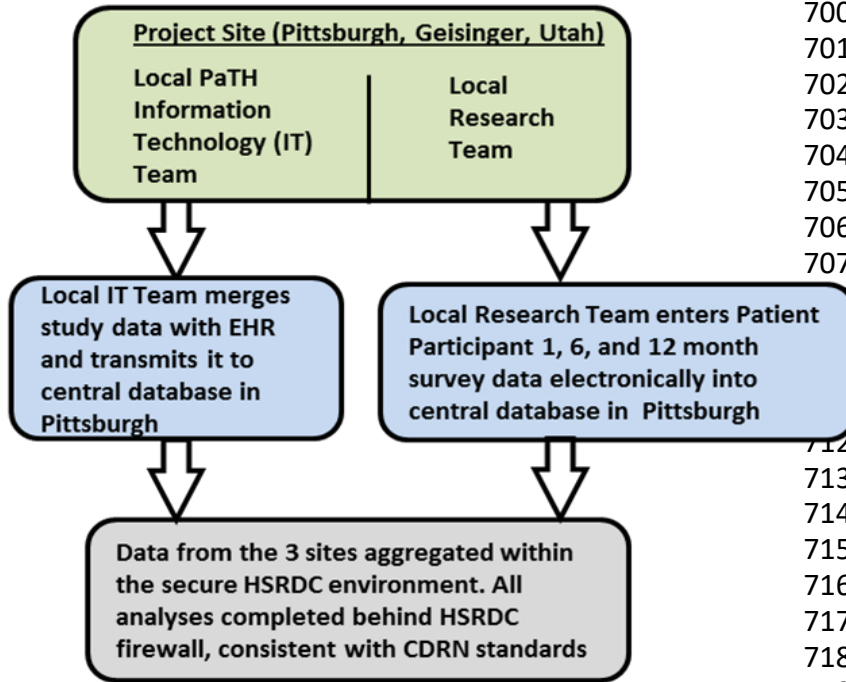

Figure 3. Data flow between PaTH CDRN sites and Pittsburgh HSRDC

699 practice alerts fired, of  
 700 subjects with qualifying  
 701 outpatient visits, and total  
 702 numbers of subjects with  
 703 completed data elements,  
 704 including the PEG  
 705 instrument. Sites have  
 706 agreed to conduct regular  
 707 sweeps of the EHR with a  
 report that documents  
 total patients meeting  
 eligibility criteria. These  
 will be used to assure that  
 we are recruiting at  
 appropriate levels at all  
 sites. The PaTH IT team at  
 each site will do weekly  
 pulls of data to track  
 eligible patients and for  
 recruitment of the 642  
 patient subset and  
 quarterly pulls of the  
 requested common data

722 elements, de-identify them, and send to the prime site (Pittsburgh), where the HSRDC team and Data  
 723 Integrity Committee will work to harmonize all of the data integral to the primary aims of the study from  
 724 the 3 sites. Data from these resources will allow us to capture comprehensive information regarding  
 725 opioid prescribing and other health care utilization for each patient in the study.

726 7.5 Qualitative Interviews

727 Qualitative interviews, coding, and analyses will be conducted by the Qualitative, Evaluation and  
 728 Stakeholder Engagement (Qual EASE) research service at the University of Pittsburgh Center for  
 729 Research on Health Care Data Center. Qual EASE is directed by co-investigator Megan Hamm, PhD, a  
 730 nationally recognized qualitative expert, and is staffed by master’s-trained collaborators with three  
 731 years’ experience working for Qual EASE. Dr. Hamm has provided current Qual EASE staff with training in  
 732 best interviewing practices (as per Dr. Hamm’s experience, and as described in Michael Patton’s  
 733 Qualitative Research & Evaluation Methods). Additionally, when new projects are initiated, Dr. Hamm  
 734 oversees piloting of new interview guides with Qual EASE staff, and listens to and provides feedback on  
 735 the first 2-3 interviews that each staff member conducts, to ensure that the guide is being followed well  
 736 and that interviewers are asking appropriate follow-up questions.

737  
 738 In order to better understand the viewpoints of the providers, we will conduct 100 half-hour long  
 739 telephone interviews with 100 providers, starting 6 months after all patients have been recruited at  
 740 their acute pain episode. This will prevent the qualitative interview from contaminating or influencing

741 provider decision-making during the acute pain care episode but still be fresh enough to assess  
742 implementation processes. We will identify willing providers from practices in all sites. Interviews will be  
743 open-ended and scripts will include perceived barriers to the intervention, satisfaction with care  
744 delivered, perceptions of success or failure and the degree to which providers believed they had to  
745 deviate from what they consider normally delivered care or perceived impact on autonomy. We will also  
746 explore provider thoughts about dissemination and implementation of findings and how they would like  
747 to receive them. The pilot qualitative interview script for providers will be developed in collaboration  
748 with co-investigators and our Stakeholder Advisory Board. Qual EASE's typical interview guide  
749 development process is to ask the study team for a list of topics and questions that they think are  
750 relevant, following which Dr. Hamm develops an interview guide that allows questions to flow through  
751 events in temporal order (if relevant), and from general questions to more specific ones. Guides begin  
752 with general, open-ended questions that allow the interviewee time to respond with as little prompting  
753 as possible, following which we ask follow-ups if something was unclear, or to prompt discussion of a  
754 facet of the topic that did not arise spontaneously in the interviewee's response. Qual EASE interviewers  
755 are empowered to ask relevant follow-ups not included in the guide if necessary, and to adjust wording  
756 if individual words are confusing or distracting to the individual interviewee. Finally, we use the  
757 readability tools embedded in Microsoft word to test that the script is at an appropriate vocabulary level  
758 for the study population, and test the script aloud amongst ourselves to ensure that questions are as  
759 comprehensible when spoken aloud as they are on the written page.

760  
761 All provider interview scripts will be pilot tested with five providers. We will use a cognitive interview  
762 approach to assess the wording and content of the interview. During our pilot of this interview script,  
763 we will pay careful attention to wording or phrasing that is unclear or causes confusion or distraction to  
764 the interviewee. Pilot interviewees will also be asked if there are changes they would make to the guide,  
765 and why they feel those changes would be helpful. Transcripts of the pilot interviews will be provided to  
766 the study team for feedback, to ensure that the questions are eliciting the type of response intended to  
767 the study team (or that, in the event that unintended response types are occurring, the information is  
768 still of use to the study). A final interview guide will be crafted in response to this feedback, but as  
769 previously stated, Qual EASE interviewers will be able to make individual adjustments as necessary. The  
770 Qual EASE team will review the pilot results with Dr. Hamm and will refine the patient and provider  
771 interview scripts accordingly. All provider participants will complete informed consent at the beginning  
772 of the project. The informed consent document will include information about the potential to be  
773 randomly selected for the qualitative interview later in the project period. We will randomly select 100  
774 selected for the qualitative interview later in the project period. We will randomly select 100 providers  
775 for the interview. Randomization will be stratified by the 4 study arms and the 3 healthcare systems  
776 (UPMC, Geisinger, Utah). Stratification by study arm and healthcare system will allow comparison of  
777 results across those factors. We will contact randomized providers by e-mail and, if no response, by  
778 phone to set up a time to further describe and schedule the interview. If contact is unsuccessful after 3  
779 attempts, we will randomly select another provider to replace them. If this process has a low yield, we  
780 will contact all of the remaining providers (that were not previously included in the random sample) at  
781 the participating practices by email.

782  
783 All interviews will be conducted by a member of Qual EASE who will have extensive training in interview  
784 data collection. All interviews will be recorded with a digital audio recorder and transcribed verbatim by  
785 trained members of Qual EASE for the final data analysis.  
786

## 787 7.6 Monitoring of Local Opioid Initiatives

788 Monthly throughout the project, the Clinical Champion at each site will record new opioid prescribing  
789 and pain management initiatives that are implemented, their key features, and start and end dates.

## 790 7.7 Outcomes

791 The majority of the outcomes (listed below) are extracted from the EHR. Only the 3-item pain and  
792 function survey is from patient report.

793

### 794 Outcomes (Aim 1)

795 1) Initial opioid prescription (yes/no) (Primary) (Hypothesis 1a). Opioid prescription at qualifying  
796 clinic visit, measured via EHR.

797 2) Initial non-opioid management (yes/no) (Secondary) (Hypothesis 1a). Defined as order for any  
798 non-opioid management strategy at baseline (e.g., non-opioid medication, physical therapy,  
799 behavioral therapy), measured via EHR.

800 3) Patient Reported Pain and Function (Secondary) (Hypothesis 1b). Measured by the 3-item  
801 Pain/Enjoyment/General Activities (PEG) instrument in clinic at baseline and via brief telephone  
802 interview at 1, 6, and 12 months.

803

### 804 Outcomes (Aim 2)

805 1) Unsafe opioid prescribing (Primary) (Hypothesis 2). Unsafe opioid prescribing will be measured  
806 via EHR at 3, 6, and 12 months after the qualifying clinic visit. At each time point, it will be  
807 defined over the prior 3 months as any of: a) receipt of initial extended release/long-acting  
808 opioid for acute pain; b) > 100 morphine milligram equivalent dose per day; c) opioid  
809 prescription in patients with substance use disorder or concurrent benzodiazepine prescription.

810 2) Chronic opioid therapy (Secondary) (Hypothesis 2). Ongoing, chronic opioid therapy will be  
811 measured via EHR at 3, 6, and 12 months.

## 812 7.8 Quality Assurance and Control

813 The study will strictly adhere to safety and quality control procedures established by the Center for  
814 Research on Health Care Data Center at University of Pittsburgh. A data and safety monitoring plan will  
815 be implemented by the Principal Investigator to ensure that there are no changes in the risk/benefit  
816 ratio during the course of the study and that the confidentiality of research data is maintained.  
817 Investigators and study personnel will meet weekly to discuss the study (e.g., study goals and  
818 modifications of those goals; subject recruitment and retention; progress in data coding and analysis;  
819 documentation, identification of adverse events or research subject complaints; potential violations of  
820 confidentiality) and address any issues or concerns at that time. Minutes will be kept for these meetings  
821 and will be maintained in the study regulatory binder. Any instances of adverse events will be reported  
822 to the University's Institutional Review Board via established procedures

823

824 De-identified data may be made available to other researchers, PCORNet sites, PCORI, and other  
825 qualified local, state, federal, and private institutions to conduct scientifically justifiable analyses, for  
826 data sharing, and to monitor the project.

827



## 828 7.9 Data Security

829 Local identifiable data will be stored on secure password-protected servers at the research units of each  
830 of the 3 sites (University of Pittsburgh, Geisinger, University of Utah). De-identified coded data will be  
831 stored on the secure, firewall protected University of Pittsburgh Health Services Research Data Center  
832 and the University of Pittsburgh Center for Research on Health Care Data Center servers, consistent with  
833 PCORI Clinical Data Research Network, HIPAA, and FISMA standards.

834  
835 Once recorded, the digital audio recordings of provider interviews will be stored on a secure, password-  
836 protected server at the University of Pittsburgh Center for Research on Health Care Data Center. No  
837 audio files will be kept on the digital audiorecorder. The digital audiorecorder will be stored in a locked  
838 file cabinet in a locked office suite within a locked building. Audio files will be identified by an individual  
839 study code and will not be linked with any personal identifiable data. The audio files will be destroyed  
840 once the qualitative analysis is done.

841  
842 In the event of real or suspected electronic data interception, hack, or breach, we will immediately  
843 report the incident to the IRB/HRPO, University of Pittsburgh Computing Services and Systems  
844 Development Security, and to the funder (PCORI). We will take immediate steps to identify the nature,  
845 extent, and cause of the incident and take corrective measures. If the incident involved identifiable  
846 participant information, we will discuss with the IRB/HRPO and PCORI the best way to notify affected  
847 participants.

848  
849 If any of the 642 patient subset and 100 providers who give verbal/web consent wish to withdraw from  
850 the study, we will give the individual the options of letting us maintain the data in the database for  
851 analysis or destroying the data. We will respect the individual's wishes. After the required data retention  
852 period, we will destroy the research records, identifiers, and linkage code information according to PaTH  
853 and Pitt Health Services Research Data Center policy.

854

## 855 8. STATISTICAL CONSIDERATIONS

### 856 8.1 General Approach

857 We will compare the distributions of baseline characteristics across the four intervention groups to  
858 assess the effectiveness of the randomization. All analyses for treatment group comparisons will use the  
859 original treatment assignment as randomized for each participant (intent-to-treat). We will adjust for  
860 the randomization stratification factors as well as baseline variables that either statistically or clinically  
861 differs across the four groups. Data transformations may be applied to outcomes depending on the  
862 shape of the distribution to better approximate normality. We will consider ease of interpretation and  
863 clinical meaningfulness when choosing transformations.

864 Our study uses a 2x2 factorial design, which evaluates the additive effects of two interventions  
865 compared to control in one experiment. For all outcomes, we do not anticipate an interaction between  
866 the two interventions will be present. That is, we believe the effect of *opioid justification* will be the  
867 same regardless of receipt of *provider justification* and vice versa. We based our assumption of no  
868 interaction between the interventions on the findings of a large, cluster-randomized trial of behavioral  
869 interventions to prevent inappropriate antibiotic use (Meeker, D., et al., *Effect of Behavioral*  
870 *Interventions on Inappropriate Antibiotic Prescribing Among Primary Care Practices: A Randomized*  
871 *Clinical Trial*. *Jama*, 2016. **315**(6): p. 562-70). The Meeker et al trial used a 2x2x2 factorial design to

872 randomize clinical sites to behavioral interventions (suggested alternatives, accountable justification,  
 873 peer comparison) that were very similar to ours. They found no significant interactions between  
 874 interventions. This ‘no interaction’ assumption on factorial design allows us to achieve the power to test  
 875 the two interventions as if we run two separate trials (each with the same size) for each of the  
 876 interventions. That is, we can have the power as high as the case where we recruit twice as many  
 877 patients to run two separate trials. However, to rule out the possibility of interaction completely, we will  
 878 test for interaction for each outcome. In the unlikely event of significant interaction, we will include the  
 879 interaction term in the model to estimate the intervention effect precisely. The analysis plan below  
 880 assumes that an interaction between *opioid justification* and *provider comparison* was not detected.  
 881

## 882 8.2 Analytic Plan for Specific Hypotheses

883 *Aim 1, Hypothesis 1a: Compared with the guideline (usual care) alone, the addition of the opioid*  
 884 *justification and provider comparison behavioral interventions will be associated with a decreased*  
 885 *proportion of opioid prescription and increased proportion of non-opioid management at the initial*  
 886 *outpatient visit for acute non-cancer pain.*  
 887

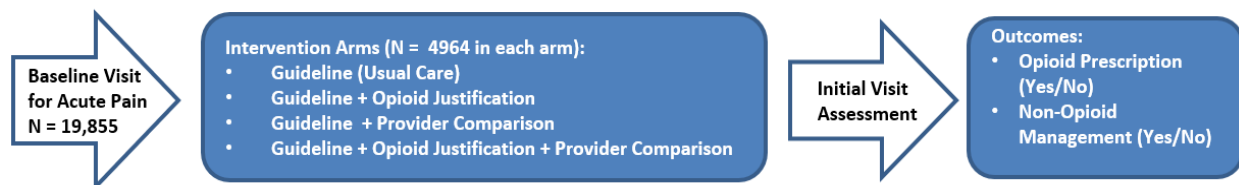

888  
 889 *Figure 4. Outcome Comparison for Hypothesis 1a: Baseline (Qualifying Visit)*

890 The primary outcome, initial opioid prescription, is expected to decrease in all four intervention groups  
 891 and our goal is to detect the difference in change in the outcome across the four groups. For our  
 892 primary analysis, we will use logistic regression to compare the initial opioid prescription after the  
 893 intervention initiation across the four groups, with baseline opioid prescription rate at each clinic (during  
 894 1 year before the intervention) and other important clinical characteristics as covariates. To investigate  
 895 further the effect of the interventions given the changing outcome rates in the background, we will use  
 896 piecewise mixed effect logistic regression with a knot at month 0 (intervention start date). Fixed effects  
 897 for this model will include an intervention group indicator (guideline (usual care) as reference group, a  
 898 dummy variable for opioid justification, and another dummy variable for provider comparison), time (in  
 899 month), intervention period indicator (1 after intervention starts, 0 before intervention starts) time  
 900 since intervention start (in month), interaction between [opioid justification and (intervention period  
 901 indicator)], interaction between [provider comparison and (intervention period indicator)], interaction  
 902 between [opioid justification and (time since intervention start)], interaction between [provider  
 903 comparison and (time since intervention start)], interaction between [opioid justification and provider  
 904 comparison and (time since intervention start)], stratification factors, and other clinical covariates as  
 905 fixed effects. We will include random effects for providers, clinics, and health systems to allow for  
 906 clustering effect within each provider, clinic and health systems. If any of the four interaction terms  
 907 (intervention period indicator × opioid justification, intervention period indicator × provider comparison,  
 908 time since intervention start × opioid justification, time since intervention start × provider comparison)  
 909 turns out to be significant, we can infer that the rate of initial opioid prescription either had sudden drop  
 910 or decreased faster in the corresponding intervention group than the guideline (usual care) group.  
 911



912 To evaluate for changes in effectiveness over time, we will create a line graph for the primary outcome  
 913 (opioid prescription rate) over time and visually inspect the data. If the EHR reminders become less  
 914 effective, the decline of opioid prescription rate will become slower later than at the beginning of the  
 915 study, which will be reflected in the line graph as the change of slope after a while since the intervention  
 916 initiation. If the change in slope is suspected, we will identify the time point (=t1) that slope changes  
 917 from the line graph, and include a term (time since t1 × intervention group) in the final model (piecewise  
 918 mixed effect logistic regression model we proposed) to test it statistically. If the coefficient of this term  
 919 turns out to be positive and statistically significant, we can say that after t1, the effect of EHR reminders  
 920 decreased significantly.

921  
 922 *Aim 1, Hypothesis 1b: Compared with usual care (guideline) alone, the addition of the opioid justification*  
 923 *and provider comparison behavioral interventions will be associated with no difference in patient-*  
 924 *reported pain, function, and satisfaction at 1, 6, and 12 months.*

926 Patient reported pain and function will be compared using a linear mixed model with PEG as the  
 927 outcome variable, and baseline PEG, intervention group indicator, time point, the interaction term

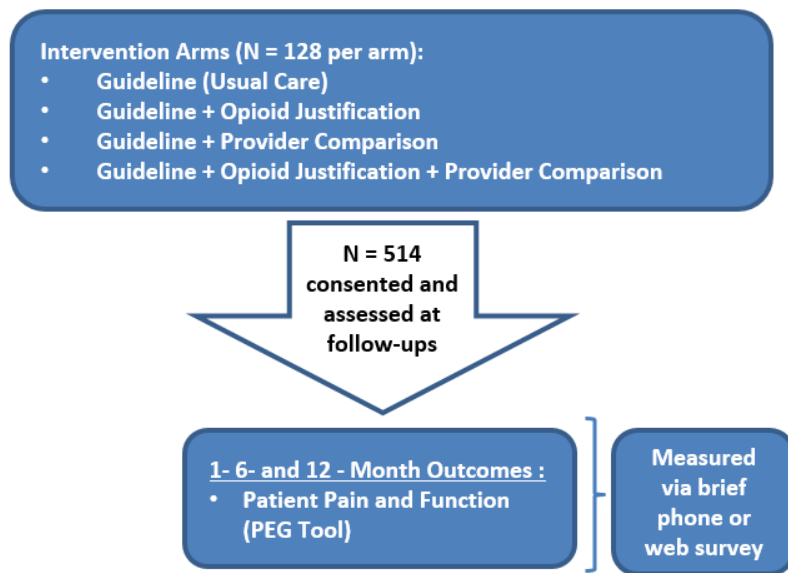

Figure 5. Outcome Comparison for Hypothesis 1b: Patient Reported Outcomes

947 to do this, for each coefficient, we will perform two 1-sided tests using a slightly different t-statistics  
 948 from that of standard t-test for regression coefficients, outlined as in Mascha and Sessler, 2011. If both  
 949 tests are significant, we will conclude equivalence of the two groups that the corresponding coefficient  
 950 represents the contrast of. Using the EHR, we will carefully assess for differences in demographics, clinic  
 951 characteristics, healthcare system, and study arm between those with and without missing baseline PEG  
 952 data and those with PEG data who do and do not consent to participate in the brief follow-up surveys.  
 953 Understanding who is in the pain and functional outcomes portion (and who is not) will be important for  
 954 reconciling the results of the reduction in opioid prescribing part of the project and the pain and  
 955 function portion of the project.

956  
 957 *Hypothesis 2: Compared with the usual care (guideline), the addition of opioid justification and provider*  
 958 *comparison behavioral interventions will be associated with a decreased proportion of patients receiving*  
 959 *unsafe opioid therapy and a decreased proportion of patients transitioning to chronic opioid therapy.*

960 For hypothesis 2, we will assess outcomes in the total sample primarily and in secondary analyses  
 961 restricted to those who were prescribed opioid at the initial visit (estimated 992 patients, 5% of baseline  
 962 sample). (Figure 6 only shows plan for those prescribed opioid at initial visit).

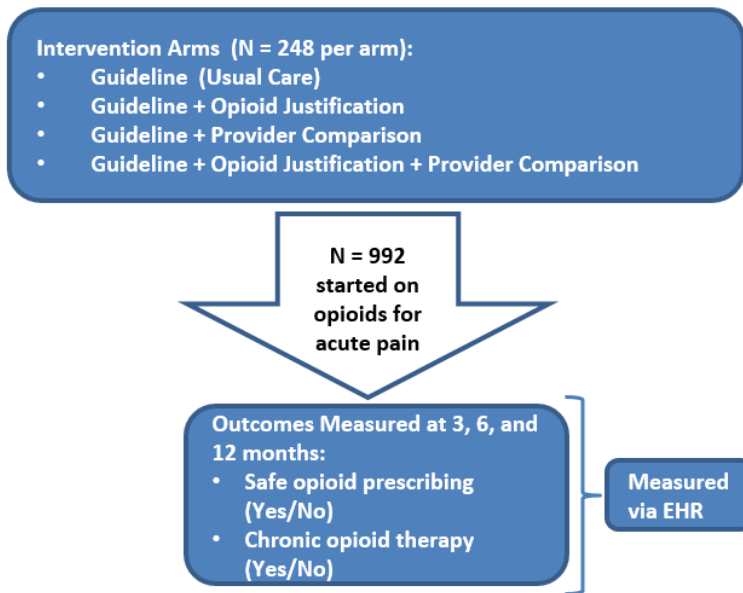

Figure 6. Outcome Comparison for Hypothesis 2a: Patients Initiated on Opioids

982 outcomes (unsafe opioid prescription and transition to chronic opioid therapy), the subgroup indicator  
 983 and the interaction terms [intervention group indicator × subgroup indicator] for both *opioid*  
 984 *justification* and *provider comparison* interventions will be included in the model. If these interaction  
 985 terms turn out to be significant, it will indicate that the effect of intervention is significantly different  
 986 between the subgroups.

### 987 8.3 Power Calculations

988 Although the planned analyses are mixed effect linear or logistic regressions that compare the four  
 989 intervention groups at the same time, we base our power analyses on two group comparisons (chi-  
 990 square test for binary outcomes and equivalence t-test for PEG) for simplicity. Since we calculated  
 991 power for two groups as if each group has the sample size of one intervention group in our 2x2 factorial  
 992 design, the power estimates here can be applied for the comparison of any possible pair of the four  
 993 intervention groups. However, if it turns out that there is no interaction between *opioid justification* and  
 994 *provider comparison* as we expect, the effect of *opioid justification* will be evaluated using all of the 4  
 995 groups ([*guideline* group and *guideline + provider comparison* group] vs. [*opioid justification* group and  
 996 *guideline + opioid justification* group]) rather than just *guideline* group vs. *guideline + opioid justification*  
 997 group, so we will actually have greater power to detect the effect of *opioid justification* than presented  
 998 below. Same argument applies to the effect of *provider comparison*. Since this is a cluster randomized  
 999 trial and we do not have any preliminary data to inform us about the intraclass correlation coefficient  
 1000 (ICC) of our clinics, we adjusted the power calculation for ICC = 0.01 and 0.032, which are the median  
 1001 and 3<sup>rd</sup> quartile of the ICCs estimated for over 1000 variables from the studies in primary care  
 1002 research.[55] To be conservative, we assumed 20% loss-to-follow up (LTF) across all the outcomes  
 1003 except for PEG which will be based on n=642 participants who will be randomly selected from our  
 1004 cohort and followed up by email or phone call; with an expected final sample of 514 after an expected  
 1005 20% attrition at 1 year (attrition rate based on experience of the similarly designed PCORI-supported

1006 multi-site TARGET low back pain trial). All powers were estimated at significance level = 0.05. In regards  
1007 to our assumption of equal cluster size, The 24 UPMC clinics will be recruited from UPMC Community  
1008 Medicine Incorporated (100+ clinics, 450,000 patients, average size 4500 patients/clinic). The 13  
1009 Geisinger clinics will be recruited from the Geisinger Community Practice Service Line (43 clinics,  
1010 300,000 patients, average size 6976 patients/clinic). The 11 Utah clinics will be recruited from the  
1011 University of Utah Health Community Physicians Group (12 clinics, 150,000 patients, average size 12,500  
1012 patients/clinic (includes children)). Except for the Utah clinics, we have not recruited the exact clinics  
1013 that will participate but do have assurances from the leadership of the UPMC and Geisinger networks to  
1014 recruit the final clinics, which will be a mix of urban and rural, large and small practices. As such, we do  
1015 not have the exact mean number of patients and variation in hand. In the original application, we  
1016 followed the recommendation of Campbell and Walters and used a coefficient of variation (standard  
1017 deviation of cluster size divided by mean cluster size) in cluster sizes of 0.65 in our sample size  
1018 calculations. [87]

1019 In Aim 1, we expect to have total of n=19,855 patients in 48 clinics. Considering 20% LTF, this translates  
1020 to 12 clinics in each intervention group with average of 331 subjects at each clinic. For % initial opioid  
1021 prescription, our sample size will achieve 81% or 41% power to detect 2.5% absolute decrease in an  
1022 intervention group of interest if the other group has 20% initial opioid prescription, assuming ICC = 0.01  
1023 or 0.032, respectively. For % initial use of non-opioid management, we can detect 10% increase in one  
1024 intervention group with 99% or 75% power assuming the other group has 40% initial use of non-opioid  
1025 management and ICC = 0.01 or 0.032. If 20% (n=642) of those with PEGs consent to complete the follow-  
1026 up surveys, we will have 87%, 99.7% and > 99.9% power at baseline mean PEGs of 3.5, 5.0, and 6.5 to  
1027 test for equivalence of PEG scores across intervention arms through 12 months after recruitment ends.  
1028

1029 **For the primary analysis power calculations**, we used a simplified power calculation method of  
1030 comparing two means or proportions between groups. This is commonly done in similarly designed  
1031 studies (Meeker, D., et al., *Effect of Behavioral Interventions on Inappropriate Antibiotic Prescribing*  
1032 *Among Primary Care Practices: A Randomized Clinical Trial*. JAMA, 2016. **315**(6): p. 562-70; Gerber, J.S.,  
1033 et al., *Effect of an outpatient antimicrobial stewardship intervention on broad-spectrum antibiotic*  
1034 *prescribing by primary care pediatricians: a randomized trial*. JAMA, 2013. **309**(22): p. 2345-52). **For the**  
1035 **more complicated task of power calculation when comparing slopes in the secondary analyses**, we  
1036 simulated 1000 sets of data for each scenario, including potential interactions. We estimated power to  
1037 detect the interaction between Opioid Justification and Provider Comparison by calculating [the number  
1038 of simulated datasets that had  $\beta_5$ 's p-value in M1 <0.05]/1000. Power to detect each main effect was  
1039 estimated by [the number of simulated datasets that had  $\beta_{2A}$ 's (or  $\beta_{2B}$ 's) p-value in M2 <0.025]/1000.  
1040 The results are summarized below. Indeed we do not have great power to detect the interaction.  
1041 However, we have very good power (>99%) to detect the main effects, even when the clinically  
1042 meaningful interaction effect exists.

1043 *Exploratory Analyses for Heterogeneity of Treatment Effects*. As described earlier, we do not have a  
1044 *priori* hypotheses regarding heterogeneity of treatment effects. There is little empiric evidence to  
1045 suggest whether health system delivered behavioral interventions for acute pain management would be  
1046 more effective in certain clinic settings or for certain patient populations. We speculate that such  
1047 interventions may be less effective in rural clinics where non-opioid management strategies, such as  
1048 physical therapy, might be less available, and perhaps more effective among a higher risk (e.g., history of  
1049 substance use disorder, mental health problems) patient population where the intervention encourages  
1050 the provider to be more cautious. However, there are little data on which to base a *priori* hypotheses.  
1051 For this reason, we plan exploratory analyses in a number of *predefined sub-groups* of clinical and health

1052 organization interest. Further, to detect an interaction effect the same size as our overall intervention  
1053 effect would require a several-fold larger sample size, which would not be feasible within the budget  
1054 constraints of the funding mechanism. For each of the following predefined subgroups (gender  
1055 (male/female), age (< 65/> 65 years), opioid abuse risk (current or past diagnosis of substance use  
1056 disorder and/or current mood disorder (anxiety/depression), Y/N), practice size (<4/>4 providers), and  
1057 practice location (urban/rural)), we will perform subgroup analysis using interaction terms in the model  
1058 for the indicated contrasts. Using the urban/rural clinic variable as an example, we will first create the  
1059 indicator variable for the subgroup of interest (urban/rural). For the outcomes in Aim 1 (initial opioid  
1060 prescription and utilization of non-opioid pain management), each of these subgroup indicator variables  
1061 and the interaction terms [time since intervention start × *opioid justification* × subgroup indicator] and  
1062 [time since intervention start × *provider comparison* × subgroup indicator] will be included as fixed  
1063 effects in the model. It certainly feasible to conduct similar *exploratory* analyses on the 2 clinical  
1064 conditions, acute musculoskeletal pain and acute headache, and we will do so. We expect  
1065 musculoskeletal pain to outnumber headache about 10,000 to 1,000. **Missing Data (MD-1-5)**. We will  
1066 compare baseline characteristics such as age, gender, and health insurance status between patients  
1067 with complete follow-up data to those with missing data by treatment group in order to assess potential  
1068 biases that may exist in the complete case analysis. We will conduct sensitivity analyses for the primary  
1069 and secondary outcomes using several methods which have different missing data assumptions: (1)  
1070 complete case analyses which assumes missing completely at random; (2) multiple imputation using  
1071 M=10 imputations, which assumes missing at random; and (3) assigning poor scores and good scores for  
1072 missing values differentially by treatment group, which aligns with non-ignorable missingness (the data  
1073 missingness is related to the actual value).

#### 1074 8.4 Qualitative Analysis for Specific Aim 3

1075 Qualitative analysis for provider interviews will follow the methods outlined by Crabtree and Miller.  
1076 Crabtree and Miller describe several potential methods for analyzing qualitative data. We will draw on  
1077 two of them: the “editing” process, followed by a “template” process. In “editing,” qualitative analysts  
1078 read through and engage with qualitative data, in this case interview transcripts, searching for  
1079 meaningful segments of text that answer main research questions. “Editing” is an inductive process  
1080 which allows the analysts to approach the data as much as possible without preconceived notions of  
1081 what the results of the analysis will be. We will use this inductive process to create a “template,” or  
1082 codebook, to be applied to all of the interviews later in order to better organize the data. As such, Qual  
1083 EASE staff, under the guidance of Dr. Megan Hamm, will begin reading transcripts in order to look for  
1084 meaningful codes emerging from the data once half of the data has been collected. They will create  
1085 codes that will be used to meaningfully categorize interviewee responses to questions. Because this  
1086 process is inductive, it is not possible at this stage to give examples of codes that we will ultimately use.  
1087 However, to give an example for clarification purposes, it is likely that we will create codes that describe  
1088 barriers to using the proposed intervention (e.g., “Barriers to Use: Distraction Caused by Pop-Ups,”  
1089 “Barriers to Use: Pop-Up/Alarm Fatigue,” “Facilitators to Use: Importance of Reducing Opiate  
1090 Prescriptions,” “Facilitators to Use: Pop-Ups Not Bothersome in Practice).

1091  
1092 Codebook construction via the editing approach will begin after ½ of the qualitative data has been  
1093 collected. A system of audit trails will be employed to document the creation of codes. A manual will be  
1094 developed for each code in the new codebooks with specific inclusion / exclusion criteria for each code  
1095 and textual examples of clear and borderline cases. Once Dr. Hamm and her team at Qual EASE feel that  
1096 the codebook sufficiently describes the range of topics that arose in the interviews, that codebook will  
1097 be applied to a randomly selected 20% of the interviews by two members of Qual EASE staff for the

1098 purposes of corroboration of coding via Cohen’s Kappa statistics. If the two coders have reached an  
1099 average kappa score of 0.6 or above (regarded as “substantial agreement”), they will independently  
1100 move on to code the remainder of the transcripts. If the two coders have not reached this level of  
1101 corroboration, adjudication discussions led by Dr. Hamm will be conducted and additional transcripts  
1102 will be coded to ensure consistent application of the codebook to all interviews. This process of coding  
1103 independently (the basis for the intercoder reliability scores) and then discussing each case has enabled  
1104 Qual EASE in previous research to maintain narrative coherence in the qualitative coding with an inter-  
1105 coder reliability kappa scores of 0.75 and above. Once all interviews have been coded, a full quote  
1106 report compiling all quotes relevant to individual codes will be produced. This quote report forms the  
1107 basis of the thematic analysis of the interviews, allowing for consideration of the full range of meaning  
1108 and experience behind each code, as well as for the consideration of relative frequency of codes. A full  
1109 analytical report of patient and provider experience will be written by Dr. Hamm. Once the qualitative  
1110 analyses are done, and in consultation with our Stakeholder Advisory Board recommendations, we will  
1111 design and conduct mixed methods analyses where we compare outcomes (opioid initiation, non-opioid  
1112 management, unsafe opioid prescribing, and progression to chronic opioid therapy) by qualitative  
1113 domain.  
1114

## 1115 9. HUMAN SUBJECTS

1116 *Institutional Review Board (IRB) Review.* The University of Pittsburgh IRB will be the IRB of record for the  
1117 project. Via the SmartIRB structure, the Geisinger and Utah IRBs will cede regulatory oversight to the  
1118 University of Pittsburgh IRB. For this project: i) a waiver of consent and HIPAA will be used to collect  
1119 medical record data on the 19,855 patients and to calculate background opioid prescribing rates; and ii)  
1120 a waiver to document written consent will be used to enroll the 100 provider participants.  
1121

1122 *Risk.* This a minimal risk study. The interventions are provider-targeted electronic health record (EHR)-  
1123 delivered, evidence-based opioid prescribing guidelines or behavioral “nudges” (entering a justification  
1124 for an opioid prescription and/or receiving periodic e-mail performance comparison on opioid  
1125 prescribing practices). Research procedures are no more than minimal risk: i) the brief PEG  
1126 questionnaire is commonly used in clinical settings and will likely take less than 1 minute to complete; it  
1127 poses little risk to the patient; and ii) the qualitative interviews of providers are intended to obtain  
1128 providers' thoughts about and experiences with the project's provider-targeted interventions. It will be a  
1129 phone interview that poses little risk to the provider. Patient participants are unlikely to note any  
1130 difference from a routine outpatient visit and the subset of patient participants who complete follow-up  
1131 surveys will only have the inconvenience of completing a brief phone or web survey. Providers will  
1132 notice additional EHR functions/windows delivered in the course of clinical care for certain patients  
1133 and/or receive a periodic e-mail. Providers will have full autonomy to manage the patient as they deem  
1134 appropriate. Because de-identified data will be tracked and transmitted to the Pittsburgh Health  
1135 Services Research Data Center (HSRDC) and Pittsburgh Center for Research on Health Care Data Center,  
1136 there is a small risk of loss of confidentiality.  
1137

1138 *Benefits.* Patients may benefit from more exposure to evidence-based care and less exposure to  
1139 potential harm from opioids. Providers may benefit from providing more evidence based care and  
1140 improved outcomes in their patients. If the interventions are effective, there will be a public health  
1141 benefit from decreased unsafe opioid prescribing.  
1142

1143 *Subject Safety.* The safety of subjects enrolled in the study and the protection of privacy will be the  
 1144 responsibility of the investigators. All research interviewers will be trained in the recognition of  
 1145 psychiatric emergencies (e.g., acute homicidality, suicidality, opioid withdrawal symptoms and signs, or  
 1146 aggressive behavior) should unforeseen problems arise during the research assessments. All urgent  
 1147 problems or emergencies will be brought to the immediate attention of the Principal Investigator and  
 1148 Project Manager.  
 1149

1150 *Staff Training.* Each member of the study team will meet with the PI and review confidentiality issues  
 1151 and complete a confidentiality agreement, prior to having contact with research subjects. All  
 1152 investigators and research personnel have completed all required Research Practice Fundamentals  
 1153 modules. All research data with identifying information will be stored in locked files. Data will be  
 1154 recorded and identified by subject code numbers only in a properly secured computer database. Only  
 1155 members of the investigative group will have access to secured files. Identities of participants will not be  
 1156 revealed in publications or presentations derived from this project. Routine weekly and as-needed  
 1157 meetings between the PI and data staff will insure that these procedures are followed and that quality  
 1158 assurance measures are observed to insure data integrity and confidentiality.  
 1159

1160 *Participant Compensation.* For the subset of 642 patients for brief follow-up surveys, participants will  
 1161 receive \$15 for each completed survey (maximum of \$45 total if all 3 time points are completed). The 48  
 1162 primary care practices will be reimbursed \$1200 per provider, unless the practice expressly disallows  
 1163 such payments. The 100 providers who complete the qualitative phone interview will each receive a  
 1164 one-time payment of \$50.  
 1165

1166 **10. ORGANIZATIONAL STRUCTURE**

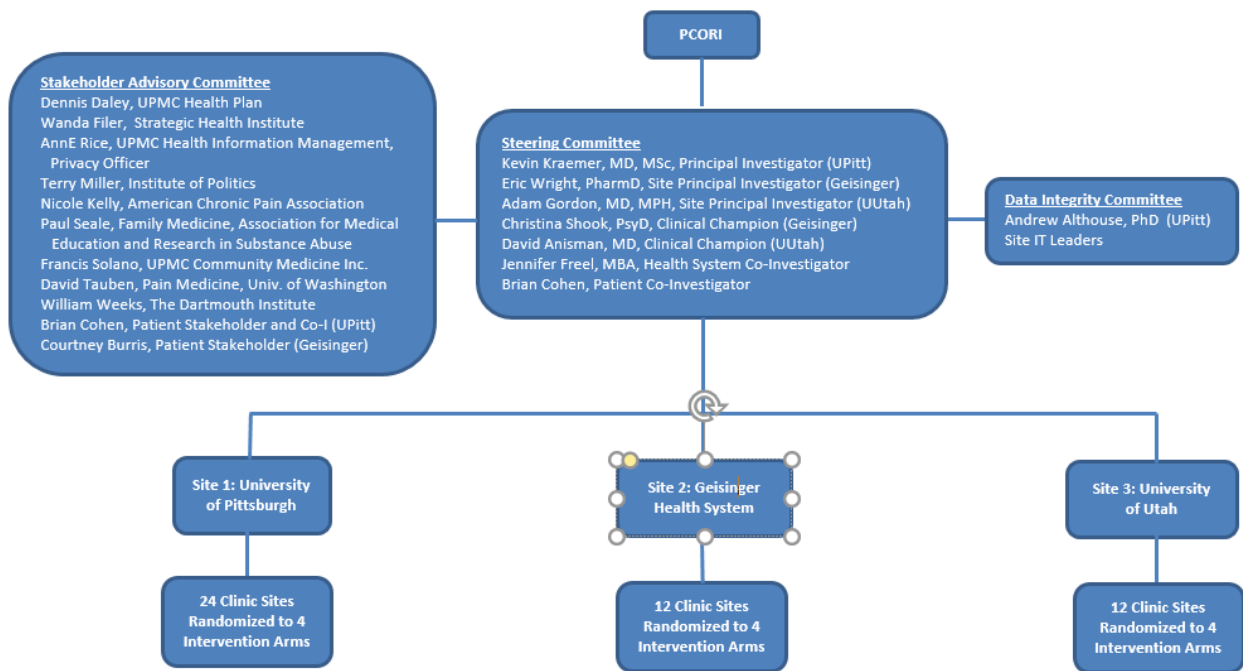

1167  
 1168 *Figure 7. PCORI Pain Project Organizational Structure*

1169



## 1170 11. STAKEHOLDER ENGAGEMENT

1171 *Planning the Study.* This proposal was designed with input from multiple stakeholders, including patients  
1172 with a history of acute pain. Early on, we valued the report from PCORI’s multi-stakeholder “Preventing  
1173 Opioid Misuse in the Management of Pain” PCORI workshop on March 7, 2016. The primary research  
1174 question for our proposal was the highest ranked research question from that workshop. In preparing  
1175 our LOI, we consulted with local patients and primary care clinicians, the PaTH Future Research  
1176 Workgroup, clinicians at the PaTH sites, UPMC administrators and health information technology  
1177 experts, and UPMC Health Plan senior administrators regarding the study design and interventions.  
1178 Once the LOI was approved, we engaged national and local stakeholders, including patients, providers,  
1179 payers, professional organizations, purchasers, and policy representatives to develop the full proposal.  
1180 From those discussions, our Stakeholder Advisory Committee (Table next page) was formed. If funded,  
1181 the Committee will work closely with the Steering Committee to develop and approve the Final Study  
1182 Protocol prior to initiating the study.

1183  
1184 *Role of the Stakeholder Advisory Board.* The role and function of the stakeholder advisory board is to: 1)  
1185 help formulate and refine the research questions, study design, and procedures; 2) participate in and  
1186 monitor the conduct of the project, including comparison of progress to the stated goals and  
1187 deliverables in the Project Plan and Timeline; 3) help plan the dissemination of the project’s findings and  
1188 identify opportunities for outreach; and 4) make recommendations and troubleshoot problems. Our  
1189 patient and stakeholder engagement plan is guided by five key principles as outlined in the PCORI  
1190 Engagement Rubric: 1) building mutual trust by engaging patients and caregivers; 2) ensuring  
1191 transparency by making all aspects of the research process open and understandable; 3) engaging in  
1192 collaborative learning; 4) respecting patients and other stakeholders; and 5) fostering partnerships.  
1193 Although the current Stakeholder Advisory Committee is primarily professionals, we anticipate adding  
1194 patients and other stakeholder that will let us fully adhere to the principles above. We will strive for  
1195 shared governance and follow a shared decision-making process in which all stakeholders are  
1196 considered equal partners and have voice.

1197  
1198 We will address the five key principles through the following ways:  
1199

- 1200 i) We will build *trust* by engaging patients and other stakeholders, recognizing individual  
1201 competencies and perspectives, encouraging and answering questions, and clarifying  
1202 anticipated outcomes. We will suggest and obtain consensus among all research partners on  
1203 ground rules for all meetings. These will emphasize active listening, not interrupting others, a  
1204 spirit of mutual respect, and a designated opportunity for all meeting participants to weigh in  
1205 with their opinions. This ensures an atmosphere of inclusivity and sensitivity to multiple  
1206 perspectives.
- 1207 ii) We will ensure *transparency* by making all aspects of the research process, including study  
1208 design, data collection and analysis as open, understandable, and replicable as possible. In  
1209 addition to the quarterly stakeholder meetings, we will maintain transparent communication for  
1210 the duration of the project with a project website. The website will be disseminated to the  
1211 entire stakeholder community and each member of the community will be invited to provide  
1212 input on the site, which will be regularly updated with study-related news. The website will  
1213 allow us to gain a much broader input from patients and PCPs throughout the duration of the  
1214 project.
- 1215 iii) We will ensure *collaborative learning* by engaging team members and stakeholders by sharing  
1216 experiences, capitalizing on each other’s resources, knowledge, and skills, evaluating each

1217 other’s ideas, and monitoring. This will be a continuous process woven into investigative team  
1218 and stakeholder advisory committee meetings. Patient co-investigators will be asked to take a  
1219 two hour online or live human subject protection training to enable them to be formally listed  
1220 on the IRB application and participate in the research as needed.

1221 iv) We will ensure *respect* for patients and stakeholders by acknowledging contributions and  
1222 protecting confidentiality. Individuals will be encouraged to bring concerns to the PI and  
1223 mitigation strategies will be developed on a case-by-case basis.

1224 v) We will ensure *partnership* by creating an environment in which investigators, staff, and  
1225 stakeholders all collaborate to advance their mutual interests from the earliest stages of the  
1226 project through to dissemination of findings. Investigators, staff, and stakeholders will all be  
1227 fairly compensated for their time, contributions, and travel.

1228  
1229 Contact and communication between the research team and stakeholder advisory committee will be  
1230 maintained between stakeholder meetings via e-mailed updates, as-needed phone calls if issues arise,  
1231 and the project website. Advisory board members will have training in what is known and what is not  
1232 known about the clinical topic of the project, behavioral “nudge” interventions, and how we will  
1233 incorporate the 5 principles of engagement into the collaboration. We will have initial team learning  
1234 sessions about patient-centeredness and stakeholder engagement. In-person meetings will be organized  
1235 to ensure an inclusive, respectful, and transparent environment. A draft meeting agenda will be  
1236 distributed well in advance of the meeting and all attendees will have the opportunity to comment or  
1237 suggest changes to the content and structure. We anticipate the meetings will be a mix of large group  
1238 and small breakout group activities to encourage participation. Leadership of groups will be rotated so  
1239 all individuals will have a chance to take an active role. All discrete sessions will allow time for open  
1240 discussion and reflection. To resolve disagreements, we will use standard conflict management  
1241 strategies including: 1) open communication; 2) focus on behavior and issues, not personalities; 3)  
1242 listening carefully; 4) identifying points of agreement and disagreement; 5) prioritizing issues; 6)  
1243 developing a plan to resolve specific issue; 7) implement and follow through on the plan; 8) building on  
1244 success; and 9) staying calm.

1245  
1246 *Completing the Stakeholder Advisory Committee:* The Stakeholder Advisory Committee will work closely  
1247 with the Steering Committee on all aspects of conducting and monitoring the study. The Stakeholder  
1248 Advisory Committee and Steering Committee will have a face-to-face day-long meeting in Pittsburgh  
1249 twice yearly and a telephone/videoconference meeting twice yearly for each year of the 3-year project.  
1250 The Data Safety and Monitoring Board (DSMB) will join the face-to-face meetings to monitor study  
1251 progress, help troubleshoot problems, and compare study progress to the stated milestones and  
1252 deliverables.

1253  
1254 *Disseminating the Results.* We will involve the Stakeholder Advisory Committee in all aspects of  
1255 dissemination and implementation. Activities will include: (1) identifying partner organizations for  
1256 dissemination to ensure meaningful and direct communication with end-users; (2) planning  
1257 dissemination efforts from the very beginning to be focused on the end product; (3) participating in  
1258 dissemination efforts, such as co-authoring manuscripts and delivering oral presentations, to offer the  
1259 patient and stakeholder perspective and to reach new and different audiences; (4) identifying new or  
1260 different opportunities to share information about the study, to move beyond traditional models of  
1261 dissemination; (5) involving national organizations, including the American Academy of Pain Medicine,  
1262 the American Pain Society, the Society of General Internal Medicine, the American Academy of Family  
1263 Physicians and patient advocacy organizations in dissemination of study findings, with similar efforts on



1264 regional and local levels; and (6) working with PCORI through their venues for dissemination and  
 1265 translation.  
 1266

1267 **12. DISSEMINATION**

1268 *Potential for disseminating and implementing the results of this research in other settings.* If our health  
 1269 system intervention of provider-targeted behavioral interventions are effective in preventing unsafe  
 1270 opioid prescribing, it will be critically important for dissemination and implementation (D&I) to occur  
 1271 rapidly and broadly. A potential boost to D&I in the case of our proposal is the widespread use and high  
 1272 market share of the Epic EHR. Despite that, barriers often compromise diffusion of research result into  
 1273 practice and diminish potential public health impact. With our Stakeholder Advisory Committee and  
 1274 other stakeholders, we will target multiple areas of dissemination. We will use the Expert  
 1275 Recommendations for Implementing Change (ERIC) recommended strategies to guide our D&I efforts  
 1276 (Table 2).  
 1277  
 1278

Table 2. ERIC Strategies for Dissemination and Implementation

| ERIC Strategy                                                                | Activity                                                                                                                                                                                                                                                                                                                                                                                                                                                                                                                                |
|------------------------------------------------------------------------------|-----------------------------------------------------------------------------------------------------------------------------------------------------------------------------------------------------------------------------------------------------------------------------------------------------------------------------------------------------------------------------------------------------------------------------------------------------------------------------------------------------------------------------------------|
| <b>Gathering information to prepare for Dissemination and Implementation</b> | <b>Assess Need and Readiness</b> <ul style="list-style-type: none"> <li>• We will incorporate queries on D&amp;I and preferences regarding receipt of findings into our year 3 qualitative interviews with providers and patients. In this way, we will better understand the barriers and needs faced by providers and patients during acute pain episodes.</li> <li>• To maximize D&amp;I impact, we will work with stakeholders throughout the study and after completion to refine the assessment of needs and readiness</li> </ul> |
| <b>Building Buy-in/Developing Relationships</b>                              | <b>Collaborate with Stakeholder Advisory Committee</b> <ul style="list-style-type: none"> <li>• Building relationships across multi-stakeholders will be a core goal of the Stakeholder Advisory Committee throughout the study.</li> <li>• The Committee will provide consultation and feedback on outcomes, analyses, and interpretation to ensure needs and concerns are understood and considered</li> <li>• Utilized Committee to monitor dissemination progress</li> </ul>                                                        |
| <b>Educating/Influencing Stakeholders</b>                                    | <b>Develop/Distribute Education Materials</b> <ul style="list-style-type: none"> <li>• Develop materials to distribute to providers in multiple formats (e.g., publications, presentations, internet, webinars)</li> <li>• Work with national organizations such as including the American Academy of Pain Medicine, the American Pain Society, the Society of General Internal Medicine, the American Academy of Family Physicians and PCORI to disseminate findings</li> </ul>                                                        |
| <b>Ensuring Quality Management</b>                                           | <b>Work with key stakeholders to implement findings</b> <ul style="list-style-type: none"> <li>• Work with Stakeholder Advisory Committee to identify</li> </ul>                                                                                                                                                                                                                                                                                                                                                                        |

|  |                                                                                                                                                   |
|--|---------------------------------------------------------------------------------------------------------------------------------------------------|
|  | health systems, federal and private payors, health information technology organizations that can help develop implementation strategies and tools |
|--|---------------------------------------------------------------------------------------------------------------------------------------------------|

1279  
1280  
1281  
1282  
1283  
1284  
1285  
1286  
1287  
1288  
1289  
1290  
1291  
1292  
1293  
1294  
1295  
1296  
1297  
1298  
1299  
1300  
1301  
1302  
1303  
1304  
1305  
1306  
1307  
1308  
1309

*Possible barriers to disseminating and implementing the results of this research in other settings and also describe any other study limitations that could have an impact on the usability of the findings.* Even if proven effective, potential barriers to D&I of the provider-targeted interventions may arise at the health system, provider, and patient level. For the health system, there may be resistance to take steps to program the behavioral interventions into the Epic EHR or concern about restricting provider’s autonomy. This may be mitigated by sharing high quality data about the impact of the intervention on outcomes and participant reactions as well as providing access to information and tools for implementing the intervention components. In addition, additional staff training and development, and access to our Epic EHR programming approach may be required prior to implementation. For providers, there may be resistance based on lack of awareness of study results, resistance to changing practice patterns, or concern the results do not apply to them or their patients. This may be mitigated by publishing in high impact journals with reach, disseminating via webinar, building a study website to inform providers, and disseminating results and recommendations through professional organizations. For patients, there may be concern implementation of such provider-targeted interventions might interfere with the doctor-patient relationship, impact provider autonomy, and perhaps lead to under-treatment of acute pain. To mitigate this, the research team, Stakeholder Advisory Committee, and health system must work closely with patients and caregivers to identify messages and means of communication to clearly articulate the benefits and potential risks of the provider-targeted interventions.

*Making study results available to study participants.* In close collaboration with the Stakeholder Advisory Committee and the study team will develop a full-color printed newsletter for distribution to our provider and consented patient participants and other entities that we feel the study information will be particularly relevant, such as health system administrators, payers, providers, and community organization. Our patient partners will be asked to provide input to ensure that the results are framed in ways that are relevant to patients and the messages are appropriately tailored to their customary communication styles. We will also include the newsletter on our implementation website and this web-based version will be updated with new information about subsequent intervention scaling efforts. The link to our website will be provided to all participants.

1310 13. REFERENCES

1311 1. Nahin, R.L., *Estimates of pain prevalence and severity in adults: United States, 2012*. J Pain, 2015.  
1312 16(8): p. 769-80.

1313 2. Medicine, I.o., *Relieving Pain in America: A Blueprint for Transforming Prevention, Care,*  
1314 *Education, and Research*. 2011, Washington, DC: The National Academies Press.

1315 3. Mafi, J.N., et al., *Worsening trends in the management and treatment of back pain*. JAMA Intern  
1316 Med, 2013. 173(17): p. 1573-81.

1317 4. Deyo, R.A., M. Von Korff, and D. Duhkoop, *Opioids for low back pain*. Bmj, 2015. 350: p. g6380.

1318 5. Mafi, J.N., et al., *Trends in the ambulatory management of headache: analysis of NAMCS and*  
1319 *NHAMCS data 1999-2010*. J Gen Intern Med, 2015. 30(5): p. 548-55.

1320 6. Epstein, H., C. Hansen, and D. Thorson, *A protocol for addressing acute pain and prescribing*  
1321 *opioids*. Minn Med, 2014. 97(4): p. 47-51.

1322 7. Zhang, W., et al., *OARSI recommendations for the management of hip and knee osteoarthritis,*  
1323 *Part II: OARSI evidence-based, expert consensus guidelines*. Osteoarthritis Cartilage, 2008. 16(2):  
1324 p. 137-62.

1325 8. Dowell, D., T.M. Haegerich, and R. Chou, *CDC Guideline for Prescribing Opioids for Chronic Pain--*  
1326 *United States, 2016*. Jama, 2016. 315(15): p. 1624-45.

1327 9. Califf, R.M., J. Woodcock, and S. Ostroff, *A Proactive Response to Prescription Opioid Abuse*. N  
1328 Engl J Med, 2016. 374(15): p. 1480-5.

1329 10. Volkow, N.D. and A.T. McLellan, *Opioid Abuse in Chronic Pain--Misconceptions and Mitigation*  
1330 *Strategies*. N Engl J Med, 2016. 374(13): p. 1253-63.

1331 11. Hughes A, W.M., Lipari RN, et al., *Prescription drug use and misuse in the United States: Results*  
1332 *from the 2015 National Survey on Drug Use and Health*. 2016, SAMSHA.

1333 12. Hedegaard, H., L.H. Chen, and M. Warner, *Drug-poisoning deaths involving heroin: United*  
1334 *States, 2000-2013*. NCHS Data Brief, 2015(190): p. 1-8.

1335 13. Jones, C.M., et al., *Vital Signs: Demographic and Substance Use Trends Among Heroin Users -*  
1336 *United States, 2002-2013*. MMWR Morb Mortal Wkly Rep, 2015. 64(26): p. 719-25.

1337 14. Compton, W.M., C.M. Jones, and G.T. Baldwin, *Relationship between Nonmedical Prescription-*  
1338 *Opioid Use and Heroin Use*. N Engl J Med, 2016. 374(2): p. 154-63.

1339 15. Cicero, T.J. and M.S. Ellis, *Nonmedical Prescription-Opioid Use and Heroin Use*. N Engl J Med,  
1340 2016. 374(13): p. 1295-6.

1341 16. Cicero, T.J., et al., *The changing face of heroin use in the United States: a retrospective analysis*  
1342 *of the past 50 years*. JAMA Psychiatry, 2014. 71(7): p. 821-6.

1343 17. Nuckols, T.K., et al., *Opioid prescribing: a systematic review and critical appraisal of guidelines*  
1344 *for chronic pain*. Ann Intern Med, 2014. 160(1): p. 38-47.

1345 18. Cheatle, M.D. and C. Barker, *Improving opioid prescription practices and reducing patient risk in*  
1346 *the primary care setting*. J Pain Res, 2014. 7: p. 301-11.

1347 19. Windmill, J., et al., *Interventions for the reduction of prescribed opioid use in chronic non-cancer*  
1348 *pain*. Cochrane Database Syst Rev, 2013(9): p. Cd010323.

1349 20. Chou, R., et al., *The effectiveness and risks of long-term opioid therapy for chronic pain: a*  
1350 *systematic review for a National Institutes of Health Pathways to Prevention Workshop*. Ann  
1351 Intern Med, 2015. 162(4): p. 276-86.

1352 21. Fox, T.R., et al., *A performance improvement prescribing guideline reduces opioid prescriptions*  
1353 *for emergency department dental pain patients*. Ann Emerg Med, 2013. 62(3): p. 237-40.

1354 22. Pentti, B., et al., *Novel peer review method for improving controlled substance prescribing in*  
1355 *primary care*. J Opioid Manag, 2016. 12(4): p. 269-79.

- 1356 23. Grimshaw, J.M., et al., *Changing provider behavior: an overview of systematic reviews of*  
1357 *interventions*. Med Care, 2001. **39**(8 Suppl 2): p. li2-45.
- 1358 24. Bates, D.W., et al., *Ten Commandments for Effective Clinical Decision Support: Making the*  
1359 *Practice of Evidence-based Medicine a Reality*. Journal of the American Medical Informatics  
1360 Association, 2003. **10**(6): p. 523-530.
- 1361 25. Embi, P.J. and A.C. Leonard, *Evaluating alert fatigue over time to EHR-based clinical trial alerts:*  
1362 *findings from a randomized controlled study*. J Am Med Inform Assoc, 2012. **19**(e1): p. e145-8.
- 1363 26. Emanuel, E.J., et al., *Using Behavioral Economics to Design Physician Incentives That Deliver*  
1364 *High-Value Care*. Ann Intern Med, 2016. **164**(2): p. 114-9.
- 1365 27. Patel, M.S. and K.G. Volpp, *Leveraging insights from behavioral economics to increase the value*  
1366 *of health-care service provision*. J Gen Intern Med, 2012. **27**(11): p. 1544-7.
- 1367 28. Loewenstein, G., T. Brennan, and K.G. Volpp, *Asymmetric paternalism to improve health*  
1368 *behaviors*. Jama, 2007. **298**(20): p. 2415-7.
- 1369 29. Loewenstein, G., D.A. Asch, and K.G. Volpp, *Behavioral economics holds potential to deliver*  
1370 *better results for patients, insurers, and employers*. Health Aff (Millwood), 2013. **32**(7): p. 1244-  
1371 50.
- 1372 30. Navathe, A.S. and E.J. Emanuel, *Physician Peer Comparisons as a Nonfinancial Strategy to*  
1373 *Improve the Value of Care*. Jama, 2016. **316**(17): p. 1759-1760.
- 1374 31. Meeker, D., et al., *Nudging guideline-concordant antibiotic prescribing: a randomized clinical*  
1375 *trial*. JAMA Intern Med, 2014. **174**(3): p. 425-31.
- 1376 32. Meeker, D., et al., *Effect of Behavioral Interventions on Inappropriate Antibiotic Prescribing*  
1377 *Among Primary Care Practices: A Randomized Clinical Trial*. Jama, 2016. **315**(6): p. 562-70.
- 1378 33. Tannenbaum, D., et al., *Nudging physician prescription decisions by partitioning the order set:*  
1379 *results of a vignette-based study*. J Gen Intern Med, 2015. **30**(3): p. 298-304.
- 1380 34. Patel, M.S., et al., *Using default options within the electronic health record to increase the*  
1381 *prescribing of generic-equivalent medications: a quasi-experimental study*. Ann Intern Med,  
1382 2014. **161**(10 Suppl): p. S44-52.
- 1383 35. Keller, P.A., et al., *Enhanced active choice: A new method to motivate behavior change*. Journal  
1384 of Consumer Psychology, 2011. **21**(4): p. 376-383.
- 1385 36. Lerner, J.S. and P.E. Tetlock, *Accounting for the effects of accountability*. Psychol Bull, 1999.  
1386 **125**(2): p. 255-75.
- 1387 37. De Cremer, D. and M. Barker, *Accountability and cooperation in social dilemmas: The influence*  
1388 *of others' reputational concerns*. Current Psychology, 2003. **22**(2): p. 155-163.
- 1389 38. Milinski, M., D. Semmann, and H.J. Krambeck, *Reputation helps solve the 'tragedy of the*  
1390 *commons'*. Nature, 2002. **415**(6870): p. 424-6.
- 1391 39. Ayres, I., S. Raseman, and A. Shih, *Evidence from Two Large Field Experiments that Peer*  
1392 *Comparison Feedback Can Reduce Residential Energy Usage*. Journal of Law, Economics, and  
1393 Organization, 2013. **29**(5): p. 992-1022.
- 1394 40. Ivers, N., et al., *Audit and feedback: effects on professional practice and healthcare outcomes*.  
1395 Cochrane Database Syst Rev, 2012(6): p. Cd000259.
- 1396 41. Hallsworth, M., et al., *Provision of social norm feedback to high prescribers of antibiotics in*  
1397 *general practice: a pragmatic national randomised controlled trial*. Lancet, 2016. **387**(10029): p.  
1398 1743-52.
- 1399 42. Waldo, S.W., et al., *Association between public reporting of outcomes with procedural*  
1400 *management and mortality for patients with acute myocardial infarction*. J Am Coll Cardiol,  
1401 2015. **65**(11): p. 1119-26.
- 1402 43. Keyes, K.M., et al., *Understanding the rural-urban differences in nonmedical prescription opioid*  
1403 *use and abuse in the United States*. Am J Public Health, 2014. **104**(2): p. e52-9.

- 1404 44. Kean, J., et al., *Comparative Responsiveness of the PROMIS Pain Interference Short Forms, Brief*  
1405 *Pain Inventory, PEG, and SF-36 Bodily Pain Subscale*. Med Care, 2016. **54**(4): p. 414-21.
- 1406 45. Krebs, E.E., et al., *Comparative responsiveness of pain outcome measures among primary care*  
1407 *patients with musculoskeletal pain*. Med Care, 2010. **48**(11): p. 1007-14.
- 1408 46. Krebs, E.E., et al., *Development and initial validation of the PEG, a three-item scale assessing*  
1409 *pain intensity and interference*. J Gen Intern Med, 2009. **24**(6): p. 733-8.
- 1410 47. Bohnert, A.S., et al., *A Detailed Exploration Into the Association of Prescribed Opioid Dosage and*  
1411 *Overdose Deaths Among Patients With Chronic Pain*. Med Care, 2016. **54**(5): p. 435-41.
- 1412 48. Bohnert, A.S., et al., *Association between opioid prescribing patterns and opioid overdose-*  
1413 *related deaths*. Jama, 2011. **305**(13): p. 1315-21.
- 1414 49. Park, T.W., et al., *Benzodiazepine prescribing patterns and deaths from drug overdose among US*  
1415 *veterans receiving opioid analgesics: case-cohort study*. Bmj, 2015. **350**: p. h2698.
- 1416 50. Sun, E.C., et al., *Incidence of and Risk Factors for Chronic Opioid Use Among Opioid-Naive*  
1417 *Patients in the Postoperative Period*. JAMA Intern Med, 2016. **176**(9): p. 1286-93.
- 1418 51. Alam, A., et al., *Long-term analgesic use after low-risk surgery: a retrospective cohort study*. Arch  
1419 Intern Med, 2012. **172**(5): p. 425-30.
- 1420 52. Gunst, R.F. and R.L. Mason, *Fractional factorial design*. Wiley Interdisciplinary Reviews:  
1421 Computational Statistics, 2009. **1**(2): p. 234-244.
- 1422 53. Mascha, E.J. and D.I. Sessler, *Equivalence and noninferiority testing in regression models and*  
1423 *repeated-measures designs*. Anesth Analg, 2011. **112**(3): p. 678-87.
- 1424 54. Adams, G., et al., *Patterns of intra-cluster correlation from primary care research to inform study*  
1425 *design and analysis*. J Clin Epidemiol, 2004. **57**(8): p. 785-94.
- 1426 55. Loudon, K., et al., *The PRECIS-2 tool: designing trials that are fit for purpose*. Bmj, 2015. **350**: p.  
1427 h2147.
- 1428 56. Broyles, L.M., et al., *Evaluation of a pilot training program in alcohol screening, brief*  
1429 *intervention, and referral to treatment for nurses in inpatient settings*. J Addict Nurs, 2013.  
1430 **24**(1): p. 8-19.
- 1431 57. Broyles, L.M., et al., *A tailored curriculum of alcohol screening, brief intervention, and referral to*  
1432 *treatment (SBIRT) for nurses in inpatient settings*. J Addict Nurs, 2013. **24**(3): p. 130-41.
- 1433 58. Broyles, L.M., et al., *A qualitative study of anticipated barriers and facilitators to the*  
1434 *implementation of nurse-delivered alcohol screening, brief intervention, and referral to*  
1435 *treatment for hospitalized patients in a Veterans Affairs medical center*. Addict Sci Clin Pract,  
1436 2012. **7**: p. 7.
- 1437 59. Broyles, L.M., et al., *Hospitalized patients' acceptability of nurse-delivered screening, brief*  
1438 *intervention, and referral to treatment*. Alcohol Clin Exp Res, 2012. **36**(4): p. 725-31.
- 1439 60. Childers, J.W., et al., *Teaching the teachers: faculty preparedness and evaluation of a retreat in*  
1440 *screening, brief intervention, and referral to treatment*. Subst Abus, 2012. **33**(3): p. 272-7.
- 1441 61. Depp, T.B., et al., *Risk factors associated with acute exacerbation of chronic obstructive*  
1442 *pulmonary disease in HIV-infected and uninfected patients*. Aids, 2016. **30**(3): p. 455-63.
- 1443 62. Gordon, A.J., et al., *Update in addiction medicine for the primary care clinician*. J Gen Intern  
1444 Med, 2008. **23**(12): p. 2112-6.
- 1445 63. Green, T.C., et al., *Patterns of drug use and abuse among aging adults with and without HIV: a*  
1446 *latent class analysis of a US Veteran cohort*. Drug Alcohol Depend, 2010. **110**(3): p. 208-20.
- 1447 64. Justice, A.C., et al., *Risk of mortality and physiologic injury evident with lower alcohol exposure*  
1448 *among HIV infected compared with uninfected men*. Drug Alcohol Depend, 2016. **161**: p. 95-103.
- 1449 65. Korthuis, P.T., et al., *Unhealthy alcohol and illicit drug use are associated with decreased quality*  
1450 *of HIV care*. J Acquir Immune Defic Syndr, 2012. **61**(2): p. 171-8.

- 1451 66. Korthuis, P.T., et al., *Quality of HIV Care and Mortality Rates in HIV-Infected Patients*. Clin Infect  
1452 Dis, 2016. **62**(2): p. 233-9.
- 1453 67. Kraemer, K.L., et al., *Alcohol problems and health care services use in human immunodeficiency  
1454 virus (HIV)-infected and HIV-uninfected veterans*. Med Care, 2006. **44**(8 Suppl 2): p. S44-51.
- 1455 68. McGinnis, K.A., et al., *Number of Drinks to "Feel a Buzz" by HIV Status and Viral Load in Men*.  
1456 AIDS Behav, 2016. **20**(3): p. 504-11.
- 1457 69. McGinnis, K.A., et al., *Comparison of AUDIT-C collected via electronic medical record and self-  
1458 administered research survey in HIV infected and uninfected patients*. Drug Alcohol Depend, 2016. **168**: p. 196-202.
- 1459 70. Rubio, D.M., et al., *Brief motivational enhancement intervention to prevent or reduce  
1460 postpartum alcohol use: a single-blinded, randomized controlled effectiveness trial*. J Subst  
1461 Abuse Treat, 2014. **46**(3): p. 382-9.
- 1462 71. Saitz, R., et al., *Some medical inpatients with unhealthy alcohol use may benefit from brief  
1463 intervention*. J Stud Alcohol Drugs, 2009. **70**(3): p. 426-35.
- 1464 72. Saitz, R., et al., *Brief intervention for medical inpatients with unhealthy alcohol use: a  
1465 randomized, controlled trial*. Ann Intern Med, 2007. **146**(3): p. 167-76.
- 1466 73. Cochran, G., et al., *An Examination of Claims-based Predictors of Overdose from a Large  
1467 Medicaid Program*. Med Care, 2016.
- 1468 74. Cochran, G., et al., *Defining Nonmedical Use of Prescription Opioids Within Health Care Claims: A  
1469 Systematic Review*. Subst Abus, 2015. **36**(2): p. 192-202.
- 1470 75. Gordon, A., et al., *Treatment Quality for Buprenorphine Care: The Pot at the End of the Rainbow*.  
1471 J Addict Med, 2016. **10**(3): p. 210-1.
- 1472 76. Gordon, A.J., et al., *Patterns and Quality of Buprenorphine Opioid Agonist Treatment in a Large  
1473 Medicaid Program*. J Addict Med, 2015. **9**(6): p. 470-7.
- 1474 77. Lo-Ciganic, W.H., et al., *Association between trajectories of buprenorphine treatment and  
1475 emergency department and in-patient utilization*. Addiction, 2016. **111**(5): p. 892-902.
- 1476 78. Jamison, R.N., et al., *Substance misuse treatment for high-risk chronic pain patients on opioid  
1477 therapy: a randomized trial*. Pain, 2010. **150**(3): p. 390-400.
- 1478 79. Smith, S.M., et al., *Pain intensity rating training: results from an exploratory study of the  
1479 ACTION PROTECT system*. Pain, 2016. **157**(5): p. 1056-64.
- 1480 80. Taylor, A.M., et al., *Assessment of physical function and participation in chronic pain clinical  
1481 trials: IMMPACT/OMERACT recommendations*. Pain, 2016. **157**(9): p. 1836-50.
- 1482 81. Wasan, A.D., *Efficacy vs effectiveness and explanatory vs pragmatic: where is the balance point  
1483 in pain medicine research?* Pain Med, 2014. **15**(4): p. 539-40.
- 1484 82. Wasan, A.D., et al., *Iatrogenic addiction in patients treated for acute or subacute pain: a  
1485 systematic review*. J Opioid Manag, 2006. **2**(1): p. 16-22.
- 1486 83. Wasan, A.D., et al., *Neural correlates of chronic low back pain measured by arterial spin labeling*.  
1487 Anesthesiology, 2011. **115**(2): p. 364-74.
- 1488 84. Wasan, A.D., et al., *Psychiatric Comorbidity Is Associated Prospectively with Diminished Opioid  
1489 Analgesia and Increased Opioid Misuse in Patients with Chronic Low Back Pain*. Anesthesiology,  
1490 2015. **123**(4): p. 861-72.
- 1491 85. Wasan, A.D., et al., *Craving of prescription opioids in patients with chronic pain: a longitudinal  
1492 outcomes trial*. J Pain, 2012. **13**(2): p. 146-54.
- 1493 86. Powell, B.J., et al., *A refined compilation of implementation strategies: results from the Expert  
1494 Recommendations for Implementing Change (ERIC) project*. Implement Sci, 2015. **10**: p. 21.
- 1495 87. Campbell MJ, Walters SJ. *How to design, analyse and report cluster randomised trials in  
1496 medicine and health related research*. 2014. Chichester: John Wiley & Sons, Ltd.
- 1497  
1498  
1499

1500 14. SUPPLEMENTS/APPENDICES

1501 Appendix A: Poster-Flyer in participating clinics

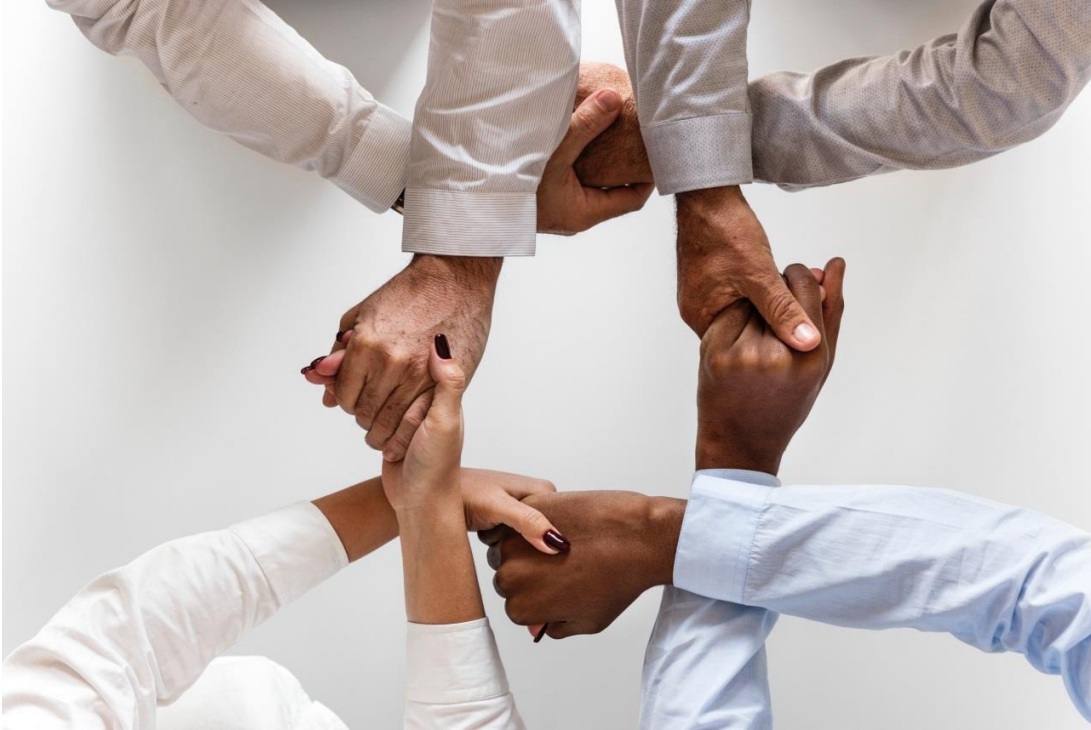

1502

1503

**NOTICE TO OUR PATIENTS:**

1504

1505

1506

1507

1508

1509

1510

1511

1512

1513

This primary care practice is taking part in a research project to promote evidence-based treatment for pain. If you have a clinic visit for pain between the dates of xx/xx/2018 and xx/xx/2019, you may be contacted by staff, via a phone call or a letter, to request permission for the project's evaluation team to contact you. Please speak with the clinic manager if you have questions. Thank you.



1514

1515 [Appendix B: Information for Practices](#)

1516 This quality improvement project is focused on the prevention of unsafe opioid prescribing for patients  
1517 with pain. The project is supported by the Patient-Centered Outcomes Research Institute (PCORI) and is  
1518 coordinated by investigators at the University of Pittsburgh, in collaboration with UPMC, Geisinger  
1519 Health System, and the University of Utah Health System. The project has received approval from the  
1520 University of Pittsburgh Human Research Protection Office, which serves as the IRB of record for this  
1521 project across the 3 health systems.

1522

1523 Key elements of the project include:

1524

- 1525 • 3 years duration, 2018-2021.
- 1526 • Forty-eight primary care clinics across these 3 health systems will be randomized to 1 of 4 low-  
1527 burden, electronic health record based interventions intended to promote evidence-based pain  
1528 management. Providers will maintain full autonomy of management decisions.
- 1529 • Patient outcomes will be extracted from the electronic health record by the project team and  
1530 stored in de-identified format in the University of Pittsburgh Health Services Research Data  
1531 Center for analysis.
- 1532 • Participating clinics will be asked to provide some basic information about provider  
1533 demographics (age, gender, years since completion of training), which will be linked to patient  
1534 data in de-identified format for analytic purposes. Clinic and provider identifiers will not appear  
1535 in reports.
- 1536 • A subsample of patients with a qualifying initial clinic visit will be asked to complete 3 brief  
1537 follow-up surveys at 1 month, 6 months, and 12 months. Participating clinics will be provided  
1538 weekly with names of patients to contact and, with the aid of a brief script provided by the  
1539 project team, request verbal permission for the project team to contact the patient. The clinic  
1540 burden for this is expected to be approximately 1-2 brief patient calls per week from mid-2018  
1541 to mid-2019.
- 1542 • Starting in mid-2019, a subsample of providers (approximately 1-3 per clinic) will be sent an e-  
1543 mail to invite participation in a phone interview assess experience with the electronic health  
1544 record intervention.
- 1545 • For participation, practices will receive \$1200 per provider in the practice.

1546

1547 Please feel free to contact [insert name] (Project Manager/Research Assistant) at [phone number] or  
1548 [insert name] (Principal Investigator) at [phone number] for any questions. Thank you.

1549

1550

1551

1552



1553 [Appendix C: Information Sheet for Providers](#)

1554 Your primary care practice is participating in a quality improvement project focused on promotion of  
1555 evidence-based management for pain in primary care. The project is supported by the Patient-Centered  
1556 Outcomes Research Institute (PCORI) and is coordinated by investigators at the University of Pittsburgh,  
1557 in collaboration with UPMC, Geisinger Health System, and the University of Utah Health System. The  
1558 project has received approval from the University of Pittsburgh Human Research Protection Office,  
1559 which serves as the IRB of record for this project across the 3 health systems.

1560

1561 Key elements of the project include:

1562

- 1563 • 3 years duration, 2018-2021.
- 1564 • Forty-eight primary care clinics across these 3 health systems will be randomized to 1 of 4 low-  
1565 burden, electronic health record based interventions intended to promote evidence-based pain  
1566 management. Providers will maintain full autonomy of management decisions.
- 1567 • Patient outcomes will be extracted from the electronic health record by the project team and  
1568 stored in de-identified format in the University of Pittsburgh Health Services Research Data  
1569 Center for analysis.
- 1570 • Participating clinics will be asked to provide some basic information about provider  
1571 demographics (age, gender, years since completion of training), which will be linked to patient  
1572 data in de-identified format for analytic purposes. Clinic and provider identifiers will not appear  
1573 in reports.
- 1574 • A subsample of patients with a qualifying initial clinic visit will be asked to complete 3 brief  
1575 follow-up surveys at 1 month, 6 months, and 12 months. Participating clinics will be provided  
1576 weekly with names of patients to contact and, with the aid of a brief script provided by the  
1577 project team, request verbal permission for the project team to contact the patient. The clinic  
1578 burden for this is expected to be approximately 1-2 brief patient calls per week from mid-2018  
1579 to mid-2019.
- 1580 • Starting in mid-2019, a random subsample of providers (approximately 1-3 per clinic) will be  
1581 sent an e-mail to invite participation in a phone interview assess experience with the electronic  
1582 health record intervention.

1583

1584 Please feel free to contact Jane Doe (Project Manager) at xxx-xxx-xxxx or Dr. Kevin Kraemer (Principal  
1585 Investigator) at 412-692-4843 for any questions. Thank you.

1586

1587

1588

1589

1590 Appendix D: Clinic Letter to Patients (subset of 642)

1591 [date]

1592

1593 [name]

1594 [address]

1595

1596 Dear [patient name]:

1597

1598 Our primary care practice is taking part in a research project focused on promoting evidence-based  
1599 management for pain.

1600

1601 We are contacting you now because you had a recent clinic visit with a pain-related diagnosis. To see  
1602 how you are doing following that visit, the project staff would like to do 3 very brief online or phone  
1603 surveys at 1 month, 6 months, and 12 months after your initial visit. The survey questions will focus on  
1604 pain, function and satisfaction with your care. Each survey will take less than 5 minutes online or by  
1605 phone, and we will compensate you for your time.

1606

1607 Evaluation staff will contact you soon to find out if you are interested in participating and to answer any  
1608 questions you may have. Or, if you prefer, you can visit the website below to learn more information  
1609 and to provide your consent for the surveys. Participation is completely voluntary, so you may also call  
1610 [insert phone number] and ask not to be contacted.

1611

[insert website link]

1612

[insert access code]

1613

1614

1615 If you have any questions or do not have internet access, please contact [insert name] (Project  
1616 Manager/ Research Assistant) at [phone number] or [insert name] (Principal Investigator) at [phone  
1617 number].

1618

1619 If you have questions about participant rights, please contact [insert IRB contact information].

1620

1621 Thank you for considering this request. And as always, we appreciate the opportunity to provide you  
1622 with high-quality, comprehensive care.

1623

1624

1625 Sincerely,

1626

1627

1628 [clinic director]

1629 Appendix E: Clinic Phone Call Script to Patients (subset of 642)

1630 [Greeting]

1631

1632 Hi Ms./Mr. [patient last name]. This is [clinic staff name] from the [name of practice].

1633

1634 Our primary care practice is taking part in a quality improvement project focused on promoting  
1635 evidence-based management for pain. We are contacting you now because you had a recent clinic visit  
1636 with a pain-related diagnosis. To see how you are doing following that visit, the evaluation staff for the  
1637 project wish to do very brief online (web-based internet) or phone surveys at 1 month, 6 months, and 12  
1638 months following that initial visit. The survey questions will focus on pain, function, and satisfaction with  
1639 care. Each survey will take less than 5 minutes online or by phone and you will be compensated for your  
1640 time.

1641

1642 Evaluation staff will be contacting you in the near future to assess your interest in participating and to  
1643 answer questions. Or, if you prefer, you can go to [website hyperlink] to learn more information and to  
1644 provide consent for the surveys. As participation is completely voluntary, you may also call xxx-xxx-xxxx  
1645 and ask to not be contacted.

1646

1647 Do you have any questions?

1648

1649 Thank you for your consideration of this request. As always, we thank you for the privilege of providing  
1650 high-quality, comprehensive care to you.

1651

1652

1653

1654

1655 [Appendix F: Phone Verbal Consent for Patients \(subset of 642\)](#)

1656 [Greeting] Hello, Ms./Mr. [patient last name], my name is [staff member's name].

1657 Thank you for taking the time to talk today. I wish to tell you about a research project that is ongoing in  
1658 your primary care practice. The project promotes safe and appropriate care for patients with pain. You  
1659 were contacted because you had a recent doctor's office visit for pain. To see how you are doing after  
1660 that visit, we wish to do very brief online (web-based) or phone surveys. You will complete the survey at  
1661 1 month, 6 months, and 12 months following the initial visit. The survey questions focus on pain,  
1662 function, and satisfaction with care. Each survey will take less than 5 minutes online or by phone. You  
1663 will receive \$15.00 for each completed survey. The maximum amount you will receive is \$45.00 if all 3  
1664 surveys are completed.

1665

1666 Here is some other important information about the project and your potential participation:

1667

- 1668 • The project is supported by the Patient-Centered Outcomes Research Institute (PCORI). It is  
1669 managed by a team at the University of Pittsburgh. The project also includes the University of  
1670 Pittsburgh Medical Center (UPMC), Geisinger Health System, and the University of Utah Health  
1671 System.
- 1672 • If you agree to participate, you will be sent a link to the online survey site. You will receive e-mail  
1673 reminders when a new survey needs to be done. We can arrange to have the surveys completed by  
1674 phone if you are not comfortable with e-mail and an online survey.
- 1675 • The survey results will be sent to the University of Pittsburgh for analysis. All identifying information  
1676 will be removed. The results will not be linked to your name. They will be linked to a random  
1677 number.
- 1678 • There is a minimal risk of loss of privacy. The project staff will take every step to protect your  
1679 identity and the privacy of your information.
- 1680 • You will not directly benefit from participation. You may receive indirect benefit by helping improve  
1681 our understanding of pain care in primary care.
- 1682 • Your \$15.00 payment will be sent after each completed survey.
- 1683 • Your participation in this project is voluntary. Your participation will not affect the care you receive  
1684 from your doctor.

1685

1686 Do you have any questions?

1687

1688 Are you interested in participating?  
1689

1690 [If yes] Thank you, we really appreciate it. Let's take some additional information so our team  
1691 can contact you to schedule the interview.  
1692

1693 [If no] Thank you, we appreciate your willingness to learn about the project.  
1694  
1695

1696 Please contact [insert name] (Project Manager/Research Assistant) at [phone number] or [insert name]  
1697 (Principal Investigator) at [phone number] for any questions.  
1698

1699 If you have questions about participant rights, please contact [IRB contact information].  
1700

1701 Additional Payment Information:  
1702

1703 Due to [insert institution name] policy and federal rules, we may have to collect additional information  
1704 to pay you for participation. Please provide your phone number below so a member of our project staff  
1705 can contact you. Project staff will call you within one week to collect the information.  
1706

1707 Phone number: [text box]  
1708  
1709  
1710

1711 [Appendix G: Online Web Consent for Patients \(subset of 642\)](#)

1712 Thank you for visiting this website today. We wish to tell you about a research project that is ongoing in  
1713 your primary care practice. The project promotes safe and appropriate care for patients with pain. You  
1714 were contacted because you had a recent doctor’s office visit for pain. To see how you are doing after  
1715 that visit, we wish to do very brief online (web-based) or phone surveys. You will complete the survey at  
1716 1 month, 6 months, and 12 months following the initial visit. The survey questions focus on pain,  
1717 function, and satisfaction with care. Each survey will take less than 5 minutes online or by phone. You  
1718 will receive \$15.00 for each completed survey. The maximum amount you will receive is \$45.00 if all 3  
1719 surveys are completed.

1720

1721 Here is some important information about the project and your participation:

1722

- 1723 • The project is supported by the Patient-Centered Outcomes Research Institute (PCORI). It is  
1724 managed by a team at the University of Pittsburgh. The project also includes the University of  
1725 Pittsburgh Medical Center (UPMC), Geisinger Health System, and the University of Utah Health  
1726 System.
- 1727 • If you agree to participate, you will be sent a link to the online survey site. You will receive e-mail  
1728 reminders when a new survey needs to be done. We can arrange to have the surveys completed by  
1729 phone if you are not comfortable with e-mail and an online survey.
- 1730 • The survey results will be sent to the University of Pittsburgh for analysis. All identifying information  
1731 will be removed. The results will not be linked to your name. They will be linked to a random  
1732 number.
- 1733 • There is a minimal risk of loss of privacy. The project staff will take every step to protect your  
1734 identity and the privacy of your information.
- 1735 • You will not directly benefit from participation. You may receive indirect benefit by helping improve  
1736 our understanding of pain care in primary care.
- 1737 • Your \$15.00 payment will be sent after each completed survey.
- 1738 • Your participation in this project is voluntary. Your participation will not affect the care you receive  
1739 from your doctor.

1740

1741 Do you have any questions? [“Yes” and “No” button options to click]

1742

1743 Are you interested in participating? [“Yes” and “No” button options to click]

1744

1745 [If yes] Thank you, we really appreciate it. Let's take some additional information so our team  
1746 can contact you to schedule the interview.

1747  
1748 [If no] Thank you, we appreciate your willingness to learn about the project.

1749  
1750 Please contact [insert name] (Project Manager/Research Assistant) at [phone number] or [insert name]  
1751 (Principal Investigator) at [phone number] for any questions.

1752  
1753 If you have questions about participant rights, please contact [IRB contact information].

1754  
1755 Additional Payment Information:

1756  
1757 Due to [insert institution name] policy and federal rules, we may have to collect additional information  
1758 to pay you for participation. Please provide your phone number below so a member of our project staff  
1759 can contact you. Project staff will call you within one week to collect the information.

1760  
1761 Phone number: [text box]

1762



1763 Appendix H: Recruitment E-mail to Providers (random 100)

1764 Send To: [provider’s email address]

1765 Subject: Invitation to Participate in Interview – PCORI Pain Project

1766

1767 Dear Dr. [provider’s name]:

1768

1769 Since 2018, [institution name] and [clinic name], [insert for Geisinger: in collaboration with the  
1770 University of Pittsburgh and University of Utah Health; insert for Pittsburgh: in collaboration with  
1771 Geisinger Health System and University of Utah Health; insert for Utah: in collaboration with the  
1772 University of Pittsburgh and Geisinger health system], have been participating in a research project to  
1773 promote evidence-based management for acute pain. The research interventions included an EHR Best  
1774 Practice Alert regarding pain management and opioid prescribing, and, depending on your practice site,  
1775 monthly e-mails containing opioid prescribing rates for opioid naïve patients.

1776 You were randomly chosen to participate in a telephone interview about your thoughts and experiences  
1777 with the provider-targeted research interventions. We would also like to gather your insights on the  
1778 current landscape of opioid prescribing and other, similar interventions that you may have experienced.  
1779 The information gathered will be crucial to help determine whether these interventions should be  
1780 disseminated to other primary care practices.

- 1781 • The interview will be conducted by a project staff member at the University of Pittsburgh.
- 1782 • The length of the interview is expected to be 20 to 30 minutes but may be longer depending on
- 1783 the amount of information you have to share.
- 1784 • Your audio-recorded answers will be transcribed, de-identified, and then categorized.
- 1785 • The evaluation of your comments along with those from other volunteers will allow us to
- 1786 identify broad topics that are important.
- 1787 • A study of this information may allow us to make recommendations about better ways to
- 1788 promote evidence-based pain management practices in primary care settings.
- 1789 • The only risk associated with participating is a small risk of loss of privacy, so it is best to
- 1790 schedule the interview when you are in a quiet, private place.
- 1791 • The audio recordings will remain at the University of Pittsburgh and will not be linked with your
- 1792 name, address, or other contact information.

1793 We greatly appreciate your consideration of this request. If you are interested in participating in the  
1794 interview please consent by clicking on the following link: [website hyperlink].

1795 Once you complete the consent, you will be contacted by a project staff member to arrange the  
1796 interview. Participants will be compensated \$50 for their time and should expect to receive the  
1797 compensation within two weeks of the completed interview.

1798 Please feel free to contact [insert name] (Project Manager/Research Assistant) at [phone number] or  
1799 [insert name] (Principal Investigator) at [phone number] for any questions.

1800

1801 If you have questions about participant rights, please contact [IRB contact information].

1802

1803 Sincerely,

1804 [signature]

1805 [primary care network director]

1806

[signature]

[principal investigator]

1807 Appendix I: Phone Verbal Consent for Providers (random 100)

1808 [greeting]

1809

1810 Hello, [provider's name]. My name is [name]. Your primary care practice has been participating in a  
1811 research project to promote evidence-based management for pain. You have been randomly selected,  
1812 along with several other providers from each of the 48 participating practices, to participate in a phone  
1813 interview. The purpose of the interview is to assess your experience with the provider-targeted  
1814 interventions of the project. Depending on your practice site, these interventions included electronic  
1815 health record alerts regarding pain management and opioid prescribing and/or e-mailed feedback on  
1816 opioid prescribing rates in opioid naïve patients.

1817

1818 The interview will be conducted by a project staff member at the University of Pittsburgh. The length of  
1819 the interview is expected to be 20 to 30 minutes but may be longer depending on the amount of  
1820 information you have to share. Your audio-recorded answers will be transcribed and categorized. The  
1821 evaluation of your comments along with those from other volunteers will allow us to identify broad  
1822 topics that are important. A study of this information may allow us to make recommendations about  
1823 better ways to promote evidence-based pain management practices in primary care settings. The  
1824 information gathered will be crucial to help determine whether these interventions should be  
1825 disseminated to other primary care practices.

1826

1827 You will not directly benefit from participation. You may receive indirect benefit by helping improve our  
1828 understanding of pain care in primary care. There is a minimal risk of loss of privacy. In order to  
1829 minimize this risk it is best to schedule the interview when you are in a quiet, private place. The project  
1830 staff will take every step to protect your identity and the privacy of your information. The audio  
1831 recordings will remain at the University of Pittsburgh and will not be linked with your name, address, or  
1832 other contact information. Your participation this interview is entirely voluntary.

1833 You will be compensated \$50 for participating in the phone interview. You will receive the  
1834 compensation within one to two weeks of the completed interview.

1835

1836 Do you have any questions?

1837

1838 Are you interested in participating?

1839 [If no] Thank you, we appreciate your willingness to hear about the project.

1840

1841 [If yes] Thank you, we really appreciate it. Let me take some additional contact information so  
1842 our team can contact you to schedule the interview. [Complete form with the following fields:  
1843 name, preferred phone number, preferred email address, preferred contact date(s) and time(s)]  
1844 A project staff member from the University of Pittsburgh will contact you during your preferred  
1845 date/time to schedule the interview; please be aware that you will receive a call from [insert  
1846 phoned number].  
1847

1848

1849 Please contact [insert name] (Project Manager/Research Assistant) at [phone number] or [insert name]  
1850 (Principal Investigator) at [phone number] for any questions.

1851

1852 If you have questions about participant rights, please contact [IRB contact information].

1853

1854 In addition to the investigator listed and their research staff, the following individuals may have access  
1855 to your information related to your participation in this research study:

- 1856 • Authorized representatives of the study sponsor and the University of Pittsburgh Office of  
1857 Research Protections may review your identifiable research information for purposes of  
1858 monitoring the conduct of this research study.
- 1859 • Participating sites in this multi-site study for purposes of data analysis or other investigators  
1860 conducting future research; however, this information will be shared in a de-identified manner  
1861 (i.e., without identifiers).

1862

1863 Additional Payment Information:

1864 Due to [insert institution name] policy and federal rules, we have to collect additional information to pay  
1865 you for participation. Project staff may also collect additional required payment information at the time  
1866 of your interview.

1867 [Complete form with: street address, city, state, zip code]

1868

1869

1870 [Appendix J: Online Web Consent for Providers \(random 100\)](#)

1871 Thank you for visiting this website today. Your primary care practice has been participating in a research  
1872 project to promote evidence-based management for pain. You have been randomly selected, along with  
1873 several other providers from each of the 48 participating practices, to participate in a phone interview.  
1874 The purpose of the interview is to assess your experience with the provider-targeted interventions of  
1875 the project. Depending on your practice site, these interventions included electronic health record alerts  
1876 regarding pain management and opioid prescribing and/or e-mailed feedback on opioid prescribing  
1877 rates in opioid naïve patients.

1878  
1879 The interview will be conducted by a project staff member at the University of Pittsburgh. The length of  
1880 the interview is expected to be 20 to 30 minutes but may be longer depending on the amount of  
1881 information you have to share. Your audio-recorded answers will be transcribed and categorized. The  
1882 evaluation of your comments along with those from other volunteers will allow us to identify broad  
1883 topics that are important. A study of this information may allow us to make recommendations about  
1884 better ways to promote evidence-based pain management practices in primary care settings. The  
1885 information gathered will be crucial to help determine whether these interventions should be  
1886 disseminated to other primary care practices.

1887  
1888 You will not directly benefit from participation. You may receive indirect benefit by helping improve our  
1889 understanding of pain care in primary care. There is a minimal risk of loss of privacy. In order to  
1890 minimize this risk it is best to schedule the interview when you are in a quiet, private place. The project  
1891 staff will take every step to protect your identity and the privacy of your information. The audio  
1892 recordings will remain at the University of Pittsburgh and will not be linked with your name, address, or  
1893 other contact information. Your participation this interview is entirely voluntary.  
1894 You will be compensated \$50 for participating in the phone interview. You will receive the  
1895 compensation within one to two weeks of the completed interview.

1896  
1897 Do you have any questions? ["Yes" and "No" button options to click]

1898  
1899 Are you interested in participating? ["Yes" and "No" button options to click]

1900  
1901 [If no] Thank you, we appreciate your willingness to hear about the project.

1902  
1903 [If yes] Thank you, we really appreciate it. Let me take some additional contact information so  
1904 our team can contact you to schedule the interview. A project staff member from the University  
1905 of Pittsburgh will contact you within two weeks or during your preferred date/time to schedule  
1906 the interview; please be aware that you will receive a call from [insert phone number].

1907 [Complete form with the following fields: preferred phone number, preferred email  
1908 address, preferred contact date(s) and time(s)]

1909  
1910 Please contact [insert name] (Project Manager) at [phone number] or [insert name] (Principal  
1911 Investigator) at [phone number] for any questions.

1912 If you have questions about participant rights, please contact [IRB contact information].

1913

1914 In addition to the investigator listed and their research staff, the following individuals may have access  
1915 to your information related to your participation in this research study:

- 1916 • Authorized representatives of the study sponsor and the University of Pittsburgh Office of  
1917 Research Protections may review your identifiable research information for purposes of  
1918 monitoring the conduct of this research study.
- 1919 • Participating sites in this multi-site study for purposes of data analysis or other investigators  
1920 conducting future research; however, this information will be shared in a de-identified manner  
1921 (i.e., without identifiers).

1922

1923 Additional Payment Information:

1924 Due to [insert institution name] policy and federal rules, we have to collect additional information to pay  
1925 you for participation; please complete the form below. Project staff may also collect additional required  
1926 payment information at the time of your interview.

1927 [Complete form with: street address, city, state, zip code]

1928

1929 Appendix K: EHR Data Extraction Computable Phenotype

1930 Inclusion criteria (must meet each criteria):

- 1931
- Age  $\geq$  18 years old
- 1932
- Established outpatient for at least 12 months in the specific system (UPMC, Geisinger, or Utah)
- 1933 before the qualifying diagnosis visit
- 1934
- Index outpatient clinic visit (primary care) for musculoskeletal pain and/or headache. Eligible
- 1935 ICD-10-CM diagnostic codes:
- 1936
- G43.00x, G43.1x, G43.4, G43.8, G44.0x, G44.2x, G44.1 (exclude any of these that use the
- 1937 .x1 or .xx9, indicating intractable headache)
- 1938
- G89.1
- 1939
- M15.xxx, M16.xxx, M17.xxx, M18.xxx, M19.xxx, M22.xxx, M23.xxx, M24.xxx, M25.xxx,
- 1940 M45.xxx, M46.xxx, M47.1xx, M47.2x, M47.81x, M89x, M50.xxx, M51.xxx, M53.xxx,
- 1941 M54.xxx, M65.xxx, M66.xxx, M67.xxx, M70.xxx, M71.xxx, M72.xxx (exclude M72.6),
- 1942 M75.xxx, M76.xxx, M77.xxx, M79.6xx, M94.xxx
- 1943
- R51, R52
- 1944
- S14.xx, S16.xxx, S19.9xx, S23.xxx, S24.xxx, S30.0xx, S30.810, S30.91XA, S40.xxx, S43.xxx,
- 1945 S50.xxx, S53.xxx, S59.9xx, S60.xxx, S63.xxx, S69.9xx, S70.xxx, S73.xxx, S79.9xx, S80.xxx,
- 1946 S83.xxx, S89.8x, S89.9x, S90.xxx, S93.xxx, S99.8, S99.9
- 1947
- [NOTE: I would also like to do a restricted look limited to the diagnoses of M54.2 Neck
- 1948 Pain, M54.5 low back pain, M54.6 thoracic pain, M79.6 pain in
- 1949 limb/hand/foot/fingers/toes, and R51 Headache]

1950 Exclusion criteria (any will exclude patient):

- 1951
- Cancer diagnosis on chart in past 12 months (includes ICD-10-CM in the Cxx.xxx and Dxx.xxx
- 1952 series; excluding non-melanoma skin cancer C44.xxx)
- 1953
- Receipt of opioid prescription (oxycodone, hydrocodone, morphine, hydromorphone,
- 1954 oxymorphone, fentanyl, codeine, tramadol, methadone) within 12 months of index outpatient
- 1955 visit

1956

1957 Appendix L: Patient Subset (N=642) – Follow-Up Survey

1958 Questions 1 through 3 are the PEG Screening Tool and question 4 is a satisfaction question.

1959

1960

1961

**1. What number best describes your pain on average in the past week:**

0 1 2 3 4 5 6 7 8 9 10

No pain

Pain as bad as  
you can imagine

1964

1965

1966

**2. What number best describes how, during the past week, pain has interfered with your enjoyment of life?**

0 1 2 3 4 5 6 7 8 9 10

Does not  
interfere

Completely  
interferes

1967

1968

1969

1970

**3. What number best describes how, during the past week, pain has interfered with your general activity?**

0 1 2 3 4 5 6 7 8 9 10

Does not  
interfere

Completely  
interferes

**4. For the past 30 days, how *satisfied* are you with the management of your pain by your primary care practice?**

0 1 2 3 4 5 6 7 8 9 10

Not at all  
satisfied

Completely  
satisfied



1971 Appendix M: Milestones/Timetable

|     | Milestone Name                                     | Description                                                                                                                                                                                                                                                                                                                                                                                                                                                                                                                                                         | Projected Completion Date |
|-----|----------------------------------------------------|---------------------------------------------------------------------------------------------------------------------------------------------------------------------------------------------------------------------------------------------------------------------------------------------------------------------------------------------------------------------------------------------------------------------------------------------------------------------------------------------------------------------------------------------------------------------|---------------------------|
| A   | Project Start Date                                 | -                                                                                                                                                                                                                                                                                                                                                                                                                                                                                                                                                                   | 2/1/2018                  |
| B1  | Establish Study Advisory Committee                 | Identify members of the Study Advisory Committee (SAC). Document the role of each research partner, including patient, caregiver and other stakeholder partners, at each stage in the research process. Submit to PCORI roster of all Advisory Committee members, including names, titles, and roles on the project as well as financial compensation associated with participation in the project.                                                                                                                                                                 | 3/2/2018                  |
| B2  | PCORI Kick-Off Call                                | Convene PCORI kick-off call with full project team.                                                                                                                                                                                                                                                                                                                                                                                                                                                                                                                 | 3/2/2018                  |
| B3  | Bi-Annual In-Person Meeting                        | Convene bi-annual in-person meeting with SAC, DSMB and Steering Committee. Please include PCORI staff in virtual invite. Meeting minutes/summary should be submitted along with progress report                                                                                                                                                                                                                                                                                                                                                                     | 3/31/2018                 |
| B4  | Finalize and submit study protocol in PCORI Online | Finalize and submit to PCORI research protocol. Please refer to PCORI Methodology Standards for required elements of study protocol.                                                                                                                                                                                                                                                                                                                                                                                                                                | 4/30/2018                 |
| B5  | ClinicalTrials.gov Registration                    | Register study with ClinicalTrials.gov. Study Identification Number and primary completion date must be sent to PCORI. List PCORI as collaborator.                                                                                                                                                                                                                                                                                                                                                                                                                  | 4/30/2018                 |
| B6  | Submit updated Recruitment Plan in PCORI Online.   | Elements in the recruitment plan should, at a minimum, include the following:<br>a. Timeline<br>b. Total target sample size for primary analysis<br>c. Name and # study sites<br>d. Historical patient volume and estimated eligible N across study sites<br>e. Estimated yield/consent<br>f. Estimated lost to follow up/attrition<br>g. Estimated monthly enrollment                                                                                                                                                                                              | 4/30/2018                 |
| B7  | Study Governance Plan                              | Establish a study governance plan and submit outline of governance and committee structure to PCORI.                                                                                                                                                                                                                                                                                                                                                                                                                                                                | 5/31/2018                 |
| B8  | Submit IRB approval in PCORI Online                | Obtain IRB Approval for all study sites and send approval letter plus materials submitted to IRB to PCORI.                                                                                                                                                                                                                                                                                                                                                                                                                                                          | 5/31/2018                 |
| B9  | Clinic Site Recruitment                            | Complete primary care clinic site recruitment (n= 24 UPMC practices, 12 Geisinger practices, 12 Utah Health Care practices)                                                                                                                                                                                                                                                                                                                                                                                                                                         | 5/31/2018                 |
| B10 | SAC Teleconference                                 | Convene teleconference meeting with SAC; Meeting minutes/summary should be submitted along with progress report                                                                                                                                                                                                                                                                                                                                                                                                                                                     | 6/30/2018                 |
| B11 | Epic Programming                                   | Complete Epic electronic health record programming, including acute pain opioid prescribing guideline, and free text justification field when prescribing opioids.                                                                                                                                                                                                                                                                                                                                                                                                  | 6/30/2018                 |
| B12 | Submit updated Engagement Plan in PCORI Online.    | Submit to PCORI an updated Engagement Plan. Elements of the updated Engagement Plan should include:<br>a. Update roster of committee/panel members with short bios<br>b. A Patient and/or Stakeholder Advisory Panel(s) or Committee(s) Governance Schematic<br>c. Planned training for patients and other stakeholder partners on the research process<br>d. Proposed Meeting Schedule<br>e. Tasks or opportunities wherein patients and/or stakeholders will have input via consultation, collaboration or leadership<br>f. Efforts to Evaluate/Assess Engagement | 6/30/2018                 |

|          |                                                 |                                                                                                                                                                                                                                                                                                                                                                                                                                                                                                      |                   |
|----------|-------------------------------------------------|------------------------------------------------------------------------------------------------------------------------------------------------------------------------------------------------------------------------------------------------------------------------------------------------------------------------------------------------------------------------------------------------------------------------------------------------------------------------------------------------------|-------------------|
| B13      | Submit Data Safety and Monitoring Plan to PCORI | Please refer to the PCORI Policy on Data Safety and Monitoring Plans for PCORI-Funded Research here: <a href="http://www.pcori.org/sites/default/files/PCORI-Policy-Data-Safety-Monitoring-Plans.pdf">http://www.pcori.org/sites/default/files/PCORI-Policy-Data-Safety-Monitoring-Plans.pdf</a>                                                                                                                                                                                                     | 6/30/2018         |
| B14      | Begin Patient Recruitment and Enrollment        | Initiate patient recruitment across UPMC, Geisinger, and Utah Health systems (n=10,936 patients) (n=48 primary care clinics); From this point forward, submit monthly enrollment update to PCORI to include cumulative and interval recruitment, accrual, and retention for the overall study (e.g. number eligible/approached/consented/enrolled, retained). Discuss due dates for monthly reports with your Program Officer. Notify your Program Officer upon enrollment of the first participant. | 7/31/2018         |
| <b>B</b> | <b>Report Submission</b>                        | <b>Submit Progress Report, Using Current Interim Progress Report Template</b>                                                                                                                                                                                                                                                                                                                                                                                                                        | <b>8/1/2018</b>   |
| C1       | SAC Teleconference                              | Convene teleconference meeting with SAC. Meeting minutes/summary should be submitted along with progress report                                                                                                                                                                                                                                                                                                                                                                                      | 9/30/2018         |
| C2       | Patient Recruitment                             | 25% of patient participants enrolled in study.                                                                                                                                                                                                                                                                                                                                                                                                                                                       | 10/31/2018        |
| C3       | 1-Month Follow-up Telephone Survey              | Complete 25% of 1 month follow-up telephone survey on patient reported outcomes of pain and function (n=500)                                                                                                                                                                                                                                                                                                                                                                                         | 12/31/2018        |
| C4       | Patient Recruitment                             | 50% of patient participants enrolled in study.                                                                                                                                                                                                                                                                                                                                                                                                                                                       | 1/31/2019         |
| C5       | SAC Teleconference                              | Convene teleconference meeting with SAC                                                                                                                                                                                                                                                                                                                                                                                                                                                              | 1/31/2019         |
| C6       | Bi-Annual In-Person Meeting                     | Convene bi-annual in-person meeting with SAC, DSMB and Steering Committee. Please include PCORI staff in virtual invite.                                                                                                                                                                                                                                                                                                                                                                             | 1/31/2019         |
| <b>C</b> | <b>Report Submission</b>                        | <b>Submit Progress Report, Using Current Interim Progress Report Template</b>                                                                                                                                                                                                                                                                                                                                                                                                                        | <b>1/31/2019</b>  |
| D1       | 1-Month Follow-up Telephone Survey              | Complete 50% of 1 month follow-up telephone survey on patient reported outcomes of pain and function (n=1000)                                                                                                                                                                                                                                                                                                                                                                                        | 3/31/2019         |
| D2       | IRB Annual Review                               | Submit IRB annual review approval letter to PCORI                                                                                                                                                                                                                                                                                                                                                                                                                                                    | 4/1/2019          |
| D3       | Patient Recruitment                             | 75% of patient participants enrolled in study.                                                                                                                                                                                                                                                                                                                                                                                                                                                       | 4/30/2019         |
| D4       | SAC Teleconference                              | Convene teleconference meeting with SAC. Meeting minutes/summary should be submitted along with progress report                                                                                                                                                                                                                                                                                                                                                                                      | 5/1/2019          |
| D5       | 6-Month Follow-up Telephone Survey              | Complete 25% of 6 month follow-up telephone survey on patient reported outcomes of pain and function                                                                                                                                                                                                                                                                                                                                                                                                 | 5/31/2019         |
| D6       | 1-Month Follow-up Telephone Survey              | Complete 75% of 1 month follow-up telephone survey on patient reported outcomes of pain and function (n=1500)                                                                                                                                                                                                                                                                                                                                                                                        | 6/30/2019         |
| D7       | Patient Recruitment                             | 100% of patient participants enrolled in study.                                                                                                                                                                                                                                                                                                                                                                                                                                                      | 7/31/2019         |
| D8       | Bi-Annual In-Person Meeting                     | Convene bi-annual in-person meeting with SAC, DSMB and Steering Committee. Please include PCORI staff in virtual invite. Meeting minutes/summary should be submitted along with progress report                                                                                                                                                                                                                                                                                                      | 7/31/2019         |
| <b>D</b> | <b>Report Submission</b>                        | <b>Submit Progress Report, Using Current Interim Progress Report Template</b>                                                                                                                                                                                                                                                                                                                                                                                                                        | <b>10/31/2019</b> |
| E1       | 6-Month Follow-up Telephone Survey              | Complete 50% of 6 month follow-up telephone survey on patient reported outcomes of pain and function                                                                                                                                                                                                                                                                                                                                                                                                 | 1/31/2020         |
| E2       | 1-Month Follow-up Telephone Survey              | Complete 100% of 1 month follow-up telephone survey on patient reported outcomes of pain and function (n=2000)                                                                                                                                                                                                                                                                                                                                                                                       | 1/31/2020         |
| E3       | SAC Teleconference                              | Convene teleconference meeting with SAC. Meeting minutes/summary should be submitted along with progress report                                                                                                                                                                                                                                                                                                                                                                                      | 1/31/2020         |
| E4       | 6-Month Follow-up Telephone Survey              | Complete 75% of 6 month follow-up telephone survey on patient reported outcomes of pain and function                                                                                                                                                                                                                                                                                                                                                                                                 | 1/31/2020         |
| E5       | 12-Month Follow-up Telephone Survey             | Complete 25% of 12 month follow-up telephone survey on patient reported outcomes of pain and function                                                                                                                                                                                                                                                                                                                                                                                                | 2/29/2020         |
| E6       | Qualitative Interviews                          | Begin qualitative telephone interviews of participating providers (n=100) attitudes and perceptions on how the interventions were perceived.                                                                                                                                                                                                                                                                                                                                                         | 3/31/2020         |
| E7       | Bi-Annual In-Person Meeting                     | Convene bi-annual in-person meeting with SAC, DSMB and Steering Committee. Please include PCORI staff in virtual invite. Meeting minutes/summary should be submitted along with progress report                                                                                                                                                                                                                                                                                                      | 3/31/2020         |

|          |                                                |                                                                                                                                                                                                                                                                                                                                                                            |                   |
|----------|------------------------------------------------|----------------------------------------------------------------------------------------------------------------------------------------------------------------------------------------------------------------------------------------------------------------------------------------------------------------------------------------------------------------------------|-------------------|
| <b>E</b> | <b>Report Submission</b>                       | <b>Submit Progress Report, Using Current Interim Progress Report Template</b>                                                                                                                                                                                                                                                                                              | <b>3/31/2020</b>  |
| F1       | 12-Month Follow-up Telephone Survey            | Complete 50% of 12 month follow-up telephone survey on patient reported outcomes of pain and function                                                                                                                                                                                                                                                                      | 4/30/2020         |
| F2       | 6-Month Follow-up Telephone Survey             | Complete 100% of 6 month follow-up telephone survey on patient reported outcomes of pain and function                                                                                                                                                                                                                                                                      | 5/31/2020         |
| F3       | Qualitative Interviews                         | Complete qualitative telephone interviews of participating providers (n=100) attitudes and perceptions on how the interventions were perceived.                                                                                                                                                                                                                            | 5/31/2020         |
| F4       | IRB Annual Review                              | Submit IRB annual review approval letter to PCORI                                                                                                                                                                                                                                                                                                                          | 7/30/2020         |
| F5       | SAC Teleconference                             | Convene teleconference meeting with SAC. Meeting minutes/summary should be submitted along with progress report                                                                                                                                                                                                                                                            | 7/30/2020         |
| F6       | 12-Month Follow-up Telephone Survey            | Complete 75% of 12 month follow-up telephone survey on patient reported outcomes of pain and function                                                                                                                                                                                                                                                                      | 8/31/2020         |
| F7       | Bi-Annual In-Person Meeting                    | Convene bi-annual in-person meeting with SAC, DSMB and Steering Committee. Please include PCORI staff in virtual invite. Meeting minutes/summary should be submitted along with progress report                                                                                                                                                                            | 8/31/2020         |
| <b>F</b> | <b>Report Submission</b>                       | <b>Submit Progress Report, Using Current Interim Progress Report Template</b>                                                                                                                                                                                                                                                                                              | <b>10/31/2020</b> |
| G1       | 12-Month Follow-up Telephone Survey            | Complete 100% of 12 month follow-up telephone survey on patient reported outcomes of pain and function                                                                                                                                                                                                                                                                     | 11/30/2020        |
| <b>G</b> | <b>Primary Completion Date</b>                 | <b>A Primary Research Completion Date must be provided when registering the study in ClinicalTrials.gov. For studies that are not clinical trials or observational studies registered on ClinicalTrials.gov, the Awardee and PCORI shall agree on a primary completion date as a milestone that precedes the agreed-upon date to submit a Draft Final Research Report.</b> | <b>1/30/2021</b>  |
| H1       | Finalize Codebook                              | Finalize codebook for provider and patient interviews.                                                                                                                                                                                                                                                                                                                     | 1/30/2021         |
| H2       | SAC Teleconference                             | Convene teleconference meeting with SAC. Meeting minutes/summary should be submitted along with progress report                                                                                                                                                                                                                                                            | 1/31/2021         |
| H3       | Dissimination Plan Finalized                   | Develop plan for publications and dissemination in collaboration with patient partners and stakeholders that make findings available and useful to patients and providers in making health care decisions.                                                                                                                                                                 | 2/28/2021         |
| H4       | Manuscript Preparation and Submission          | Prepare study manuscripts for submission and presentation of study findings.                                                                                                                                                                                                                                                                                               | 2/28/2021         |
| H5       | Final Analyses                                 | Complete final analyses for all study outcomes                                                                                                                                                                                                                                                                                                                             | 4/30/2021         |
| H6       | Stakeholder Advisory Committee Meeting         | Convene sixth meeting of the SAC. Meeting minutes/summary should be submitted along with progress report                                                                                                                                                                                                                                                                   | 5/31/2021         |
| H7       | Bi-Annual In-Person Meeting                    | Convene bi-annual in-person meeting with SAC, DSMB and Steering Committee. Please include PCORI staff in virtual invite. Meeting minutes/summary should be submitted along with progress report                                                                                                                                                                            | 8/31/2021         |
| <b>H</b> | <b>Final Progress Report</b>                   | <b>Submit Final Progress Report, Using Final Progress Report Template</b>                                                                                                                                                                                                                                                                                                  | <b>8/31/2021</b>  |
| <b>I</b> | <b>Research Project Period End Date</b>        | <b>Research Project Period End Date</b>                                                                                                                                                                                                                                                                                                                                    | <b>10/31/2021</b> |
| <b>J</b> | <b>Results submitted to ClinicalTrials.gov</b> | Awardee ensures results are submitted to ClinicalTrials.gov. For ClinicalTrials.gov, the generated tables are a required section in the Draft Final Research Report. Results must be submitted no later than 30 days before Draft Final Research Report Submission Milestone to provide time for ClinicalTrials.gov to conduct quality checks.                             | <b>10/31/2021</b> |
| <b>K</b> | <b>Draft Final Research Report Submission</b>  | Submit Draft Final Research Report according to instructions found at: <a href="http://www.pcori.org/awardee-resources">http://www.pcori.org/awardee-resources</a><br><br>*All Draft Final Research Reports must be submitted no later than 30 days from when results are posted to clinicaltrials.gov or other applicable website. Refer to Contract.                     | <b>12/1/2021</b>  |

1972

|          |                                                |                                                                                                                                                          |                                               |
|----------|------------------------------------------------|----------------------------------------------------------------------------------------------------------------------------------------------------------|-----------------------------------------------|
| <b>L</b> | <b>Final Research Report</b>                   | Upon receipt of written summary, and as applicable, PI will make revisions and submit revised Draft Final Research Report for acceptance within 90 days. | <b>9/1/2022</b>                               |
| <b>M</b> | <b>Approval / sign off of the Lay Abstract</b> | Sign off must be no later than 90 days beyond the date PCORI accepts the final research report                                                           | <b>See Description</b>                        |
| <b>N</b> | <b>Contract Term Date</b>                      | <b>Contract Term Date</b>                                                                                                                                | <b>11/30/2022</b>                             |
| <b>O</b> | <b>Final Expenditure Report</b>                | <b>Submit Final Expenditure Report (See Contract for Instructions)</b>                                                                                   | <b>Within 90 Days from Contract Term Date</b> |
| <b>P</b> | <b>Notification of Public Acceptance</b>       | <b>See Contract for Instructions</b>                                                                                                                     | <b>Within 30 Days of Acceptance</b>           |
