# Supplementary material for: Effect of Different Interventions to Help Primary Care Clinicians Avoid Unsafe Opioid Prescribing in Opioid-Naive Patients With Acute Noncancer Pain: A Cluster Randomized Clinical Trial
Source: PubMed Central journal article supplement (PMC9338412; doi:10.1001/jamahealthforum.2022.2263), 2022-07-29
Supplement: jamahealthforum-e222263-s004.pdf [file jamahealthforum-e222263-s004.pdf]

## Data Sharing Statement

Kraemer. Effect of Different Interventions to Help Primary Care Clinicians Avoid Unsafe Opioid Prescribing in Opioid-Naive Patients With Acute Noncancer Pain. *JAMA Health Forum*. Published July 29, 2022. doi:10.1001/jamahealthforum.2022.2263

### Data

**Data available:** Yes

**Data types:** Deidentified participant data

**How to access data:** We will make deidentified data available per PCORI policy. A URL for data access is not yet available. Requests may be made to the corresponding author (Kraemer) at [kek5@pitt.edu](mailto:kek5@pitt.edu)

**When available:** beginning date: 12-01-2022

### Supporting Documents

**Document types:** None

### Additional Information

**Who can access the data:** To researchers whose proposed use of the data has been approved

**Types of analyses:** Per PCORI policy, the sharing of data must be in a manner that is appropriate for the nature of the funded research project and that is consistent with applicable privacy, security, and other legal requirements.

**Mechanisms of data availability:** With a signed data access agreement

**Any additional restrictions:** Any access will need to comply with PCORI Policy for Data Management and Data Sharing (<https://www.pcori.org/sites/default/files/PCORI-Policy-for-Data-Management-and-Data-Sharing.pdf>)
